# Supplementary material
Source: PubMed Central journal article supplement (PMC4775384)
Supplement: NIHMS749191-supplement-4.pdf [file NIHMS749191-supplement-4.pdf]

**Supplementary Table 5: Genes differently expressed between current and never and between current and past/never smokers in the combined cohort of 67 prostate tumors**

Gene list was generated using the Bioconductor limma R package. All genes are  $P < 0.05$  in the two gene lists.

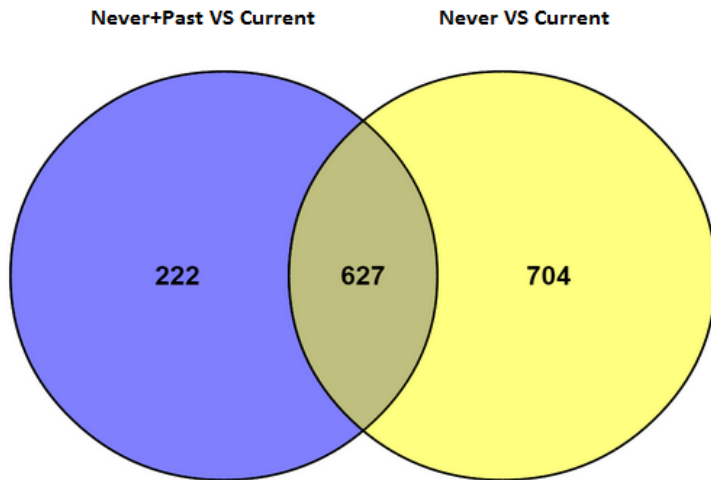

627 probesets common to both contrasts at  $P < 0.05$ . 601 probesets could be mapped to annotated genes and were used for further analysis

**Enrichment of these genes in KEGG pathway analysis and GO terms**

| KEGG pathway analysis                     |                                                         |       |        |             |                 |         |          |             |
|-------------------------------------------|---------------------------------------------------------|-------|--------|-------------|-----------------|---------|----------|-------------|
| Term                                      | Count                                                   | %     | PValue | Fold Enrich | BH_adjP         | FDR     |          |             |
| Antigen processing and presentation       | 13                                                      | 2.55  | 0.00   | 4.53        | 0.003           | 0.03    |          |             |
| Graft-versus-host disease                 | 6                                                       | 1.18  | 0.01   | 4.44        | 0.51            | 11.34   |          |             |
| Prostate cancer                           | 9                                                       | 1.76  | 0.01   | 2.92        | 0.40            | 12.24   |          |             |
| Natural killer cell mediated cytotoxicity | 11                                                      | 2.16  | 0.02   | 2.39        | 0.42            | 17.03   |          |             |
| Glioma                                    | 7                                                       | 1.37  | 0.02   | 3.21        | 0.44            | 21.60   |          |             |
| Viral myocarditis                         | 7                                                       | 1.37  | 0.03   | 2.85        | 0.56            | 33.85   |          |             |
| GO Term analysis                          |                                                         |       |        |             |                 |         |          |             |
| GO_Category                               | Term                                                    | Count | %      | PValue      | Fold Enrichment | BH_adjP | FDR      |             |
| BP                                        | immune response                                         | 49    |        | 9.607843137 | 3.23E-08        | 2.38    | 8.57E-05 | 5.73E-05    |
| MF                                        | antigen binding                                         | 12    |        | 2.352941176 | 7.07E-07        | 7.10    | 4.60E-04 | 0.001055894 |
| BP                                        | lymphocyte activation                                   | 17    |        | 3.333333333 | 3.00E-04        | 2.87    | 0.33     | 0.53        |
| BP                                        | T cell activation                                       | 13    |        | 2.549019608 | 3.70E-04        | 3.46    | 0.28     | 0.65        |
| BP                                        | cell activation                                         | 21    |        | 4.117647059 | 3.75E-04        | 2.46    | 0.22     | 0.66        |
| BP                                        | T cell differentiation                                  | 9     |        | 1.764705882 | 6.50E-04        | 4.65    | 0.29     | 1.15        |
| MF                                        | transcription activator activity                        | 26    |        | 5.098039216 | 6.68E-04        | 2.10    | 0.20     | 0.99        |
| BP                                        | regulation of cell activation                           | 15    |        | 2.941176471 | 7.39E-04        | 2.88    | 0.28     | 1.30        |
| BP                                        | positive regulation of immune system process            | 18    |        | 3.529411765 | 7.70E-04        | 2.54    | 0.25     | 1.36        |
| BP                                        | glycerophospholipid metabolic process                   | 12    |        | 2.352941176 | 7.71E-04        | 3.41    | 0.23     | 1.36        |
| BP                                        | leukocyte activation                                    | 18    |        | 3.529411765 | 9.27E-04        | 2.50    | 0.24     | 1.63        |
| BP                                        | positive regulation of multicellular organismal process | 18    |        | 3.529411765 | 1.01E-03        | 2.48    | 0.24     | 1.79        |
| BP                                        | regulation of cellular localization                     | 18    |        | 3.529411765 | 1.21E-03        | 2.44    | 0.25     | 2.13        |

|               |                                                             |              |                                 |                                      |                |      |      |
|---------------|-------------------------------------------------------------|--------------|---------------------------------|--------------------------------------|----------------|------|------|
| BP            | SMAD protein nuclear translocation                          | 4            | 0.784313725                     | 1.30E-03                             | 16.78          | 0.25 | 2.29 |
| BP            | regulation of protein modification process                  | 20           | 3.921568627                     | 1.34E-03                             | 2.28           | 0.24 | 2.35 |
| BP            | response to organic substance                               | 37           | 7.254901961                     | 1.60E-03                             | 1.72           | 0.26 | 2.80 |
| BP            | positive regulation of macromolecule metabolic process      | 42           | 8.235294118                     | 1.69E-03                             | 1.65           | 0.26 | 2.96 |
| BP            | positive regulation of cell activation                      | 11           | 2.156862745                     | 1.71E-03                             | 3.33           | 0.25 | 3.00 |
| BP            | regulation of transcription from RNA polymerase II promoter | 37           | 7.254901961                     | 1.82E-03                             | 1.71           | 0.25 | 3.19 |
| BP            | regulation of cellular protein metabolic process            | 27           | 5.294117647                     | 2.03E-03                             | 1.91           | 0.26 | 3.54 |
| CC            | Golgi apparatus                                             | 40           | 7.843137255                     | 2.03E-03                             | 1.65           | 0.51 | 2.74 |
| BP            | regulation of homeostatic process                           | 11           | 2.156862745                     | 2.09E-03                             | 3.24           | 0.25 | 3.65 |
| MF            | enzyme binding                                              | 29           | 5.68627451                      | 2.34E-03                             | 1.84           | 0.40 | 3.44 |
| MF            | chemokine activity                                          | 7            | 1.37254902                      | 2.43E-03                             | 5.04           | 0.33 | 3.56 |
| BP            | regulation of cytokine production                           | 14           | 2.745098039                     | 2.96E-03                             | 2.60           | 0.33 | 5.13 |
|               |                                                             |              |                                 |                                      |                |      |      |
|               |                                                             |              | <b>Current vs. never (ref.)</b> | <b>Current vs. past/never (ref.)</b> |                |      |      |
| <b>Probes</b> | <b>GeneSymbols</b>                                          | <b>logFC</b> | <b>P.Value</b>                  | <b>logFC</b>                         | <b>P.Value</b> |      |      |
| 1405_i_at     | CCL5                                                        | 0.8682       | 0.0042                          | 0.6450                               | 0.0159         |      |      |
| 200617_at     | MLEC                                                        | -0.2617      | 0.0293                          | -0.2184                              | 0.0378         |      |      |
| 200688_at     | SF3B3                                                       | -0.2192      | 0.0046                          | -0.1788                              | 0.0085         |      |      |
| 200887_s_at   | STAT1                                                       | 0.4673       | 0.0038                          | 0.4121                               | 0.0036         |      |      |
| 200905_x_at   | HLA-E                                                       | 0.3606       | 0.0256                          | 0.3022                               | 0.0327         |      |      |
| 200908_s_at   | RPLP2                                                       | -0.3776      | 0.0258                          | -0.2922                              | 0.0492         |      |      |
| 200962_at     | RPL31                                                       | 0.5235       | 0.0369                          | 0.4468                               | 0.0419         |      |      |
| 201057_s_at   | GOLGB1                                                      | -0.1488      | 0.0214                          | -0.1412                              | 0.0127         |      |      |
| 201140_s_at   | RAB5C                                                       | -0.2060      | 0.0309                          | -0.1878                              | 0.0246         |      |      |
| 201199_s_at   | PSMD1                                                       | -0.1424      | 0.0181                          | -0.1609                              | 0.0026         |      |      |
| 201205_at     | RRBP1                                                       | -0.1838      | 0.0075                          | -0.1456                              | 0.0159         |      |      |
| 201370_s_at   | CUL3                                                        | 0.2273       | 0.0112                          | 0.1668                               | 0.0345         |      |      |
| 201488_x_at   | KHDRBS1                                                     | 0.2394       | 0.0059                          | 0.2186                               | 0.0042         |      |      |
| 201568_at     | UQCRQ                                                       | -0.2068      | 0.0213                          | -0.1761                              | 0.0252         |      |      |
| 201572_x_at   | DCTD                                                        | -0.1647      | 0.0106                          | -0.1315                              | 0.0201         |      |      |
| 201587_s_at   | IRAK1                                                       | -0.3190      | 0.0055                          | -0.2369                              | 0.0193         |      |      |
| 201606_s_at   | PWP1                                                        | 0.1797       | 0.0314                          | 0.1494                               | 0.0410         |      |      |
| 201611_s_at   | ICMT                                                        | -0.2658      | 0.0025                          | -0.2143                              | 0.0055         |      |      |
| 201996_s_at   | SPEN                                                        | 0.4956       | 0.0373                          | 0.4255                               | 0.0411         |      |      |
| 202035_s_at   | SFRP1                                                       | 0.5091       | 0.0335                          | 0.5031                               | 0.0166         |      |      |
| 202084_s_at   | SEC14L1                                                     | -0.2386      | 0.0246                          | -0.2124                              | 0.0223         |      |      |
| 202087_s_at   | CTSL                                                        | -0.1519      | 0.0486                          | -0.1500                              | 0.0264         |      |      |
| 202106_at     | GOLGA3                                                      | -0.2456      | 0.0166                          | -0.1795                              | 0.0467         |      |      |
| 202175_at     | CHPF                                                        | -0.2807      | 0.0075                          | -0.1861                              | 0.0460         |      |      |
| 202252_at     | RAB13                                                       | -0.1685      | 0.0132                          | -0.1354                              | 0.0232         |      |      |
| 202358_s_at   | SNX19                                                       | -0.1901      | 0.0134                          | -0.1764                              | 0.0089         |      |      |
| 202405_at     | TIAL1                                                       | 0.2206       | 0.0133                          | 0.1872                               | 0.0165         |      |      |
| 202412_s_at   | USP1                                                        | 0.3127       | 0.0367                          | 0.2652                               | 0.0431         |      |      |
| 202486_at     | AFG3L2                                                      | -0.2185      | 0.0152                          | -0.2086                              | 0.0083         |      |      |
| 202607_at     | NDST1                                                       | -0.2582      | 0.0014                          | -0.1868                              | 0.0091         |      |      |
| 202659_at     | PSMB10                                                      | 0.3776       | 0.0203                          | 0.3018                               | 0.0343         |      |      |
| 202704_at     | TOB1                                                        | 0.3272       | 0.0042                          | 0.2603                               | 0.0096         |      |      |
| 202761_s_at   | SYNE2                                                       | 0.3488       | 0.0176                          | 0.2703                               | 0.0361         |      |      |
| 202819_s_at   | TCEB3                                                       | -0.1909      | 0.0054                          | -0.1430                              | 0.0182         |      |      |
| 202845_s_at   | RALBP1                                                      | -0.2905      | 0.0065                          | -0.2034                              | 0.0312         |      |      |
| 202881_x_at   | NOL7                                                        | -0.2020      | 0.0027                          | -0.1538                              | 0.0095         |      |      |
| 202893_at     | UNC13B                                                      | -0.3572      | 0.0114                          | -0.2991                              | 0.0157         |      |      |
| 202901_x_at   | CTSS                                                        | 0.6132       | 0.0033                          | 0.4648                               | 0.0115         |      |      |

|             |          |         |        |         |        |  |  |
|-------------|----------|---------|--------|---------|--------|--|--|
| 202902_s_at | CTSS     | 0.6684  | 0.0036 | 0.4553  | 0.0257 |  |  |
| 202953_at   | C1QB     | 0.5518  | 0.0135 | 0.3921  | 0.0465 |  |  |
| 203028_s_at | CYBA     | 0.4746  | 0.0183 | 0.3502  | 0.0477 |  |  |
| 203085_s_at | TGFB1    | 0.4569  | 0.0237 | 0.3869  | 0.0287 |  |  |
| 203172_at   | FXR2     | -0.1725 | 0.0326 | -0.1527 | 0.0308 |  |  |
| 203223_at   | RABEP1   | -0.3095 | 0.0480 | -0.2691 | 0.0495 |  |  |
| 203275_at   | IRF2     | 0.1849  | 0.0413 | 0.1722  | 0.0300 |  |  |
| 203288_at   | KIAA0355 | -0.2190 | 0.0196 | -0.1776 | 0.0308 |  |  |
| 203327_at   | IDE      | -0.3186 | 0.0004 | -0.2698 | 0.0007 |  |  |
| 203331_s_at | INPP5D   | 0.2399  | 0.0231 | 0.2052  | 0.0265 |  |  |
| 203346_s_at | MTF2     | 0.2349  | 0.0348 | 0.1935  | 0.0472 |  |  |
| 203347_s_at | MTF2     | 0.1963  | 0.0336 | 0.1799  | 0.0262 |  |  |
| 203355_s_at | PSD3     | 0.4928  | 0.0117 | 0.3692  | 0.0318 |  |  |
| 203409_at   | DDB2     | 0.3955  | 0.0137 | 0.2823  | 0.0460 |  |  |
| 203439_s_at | STC2     | -0.1923 | 0.0312 | -0.1870 | 0.0169 |  |  |
| 203471_s_at | PLEK     | 0.4942  | 0.0104 | 0.3508  | 0.0393 |  |  |
| 203516_at   | SNTA1    | -0.2050 | 0.0237 | -0.1785 | 0.0245 |  |  |
| 203579_s_at | SLC7A6   | -0.2557 | 0.0136 | -0.1935 | 0.0336 |  |  |
| 203606_at   | NDUFS6   | -0.1636 | 0.0473 | -0.1546 | 0.0322 |  |  |
| 203678_at   | FAN1     | -0.1961 | 0.0169 | -0.1488 | 0.0392 |  |  |
| 203681_at   | IVD      | -0.1143 | 0.0147 | -0.1061 | 0.0098 |  |  |
| 203828_s_at | IL32     | 0.4979  | 0.0260 | 0.3881  | 0.0479 |  |  |
| 203852_s_at | SMN1     | 0.3251  | 0.0494 | 0.2939  | 0.0424 |  |  |
| 203876_s_at | MMP11    | -0.1541 | 0.0460 | -0.1422 | 0.0356 |  |  |
| 203907_s_at | IQSEC1   | -0.1813 | 0.0138 | -0.1308 | 0.0437 |  |  |
| 203915_at   | CXCL9    | 0.9265  | 0.0100 | 0.7572  | 0.0164 |  |  |
| 203929_s_at | MAPT     | -0.4191 | 0.0303 | -0.3557 | 0.0358 |  |  |
| 203941_at   | INTS9    | 0.2260  | 0.0351 | 0.2278  | 0.0156 |  |  |
| 204116_at   | IL2RG    | 0.6193  | 0.0005 | 0.4801  | 0.0021 |  |  |
| 204144_s_at | PIGQ     | -0.2341 | 0.0049 | -0.2035 | 0.0052 |  |  |
| 204195_s_at | PKNOX1   | 0.1368  | 0.0480 | 0.1402  | 0.0210 |  |  |
| 204196_x_at | PKNOX1   | 0.0861  | 0.0428 | 0.1187  | 0.0021 |  |  |
| 204200_s_at | PDGFB    | -0.1407 | 0.0390 | -0.1253 | 0.0357 |  |  |
| 204258_at   | CHD1     | 0.3489  | 0.0179 | 0.2985  | 0.0208 |  |  |
| 204279_at   | PSMB9    | 0.4979  | 0.0394 | 0.4158  | 0.0494 |  |  |
| 204314_s_at | CREB1    | 0.2662  | 0.0413 | 0.2243  | 0.0496 |  |  |
| 204328_at   | TMC6     | -0.3331 | 0.0099 | -0.3208 | 0.0047 |  |  |
| 204354_at   | POT1     | 0.2016  | 0.0318 | 0.1686  | 0.0404 |  |  |
| 204381_at   | LRP3     | -0.1985 | 0.0126 | -0.1795 | 0.0101 |  |  |
| 204390_at   | TRIM24   | -0.1598 | 0.0015 | -0.1154 | 0.0099 |  |  |
| 204449_at   | PDCL     | 0.1853  | 0.0144 | 0.1484  | 0.0254 |  |  |
| 204533_at   | CXCL10   | 1.0340  | 0.0018 | 0.8305  | 0.0044 |  |  |
| 204574_s_at | MMP19    | -0.1286 | 0.0376 | -0.1089 | 0.0443 |  |  |
| 204601_at   | N4BP1    | 0.2035  | 0.0086 | 0.1722  | 0.0112 |  |  |
| 204617_s_at | ACD      | 0.1679  | 0.0401 | 0.1527  | 0.0330 |  |  |
| 204628_s_at | ITGB3    | -0.1347 | 0.0298 | -0.1186 | 0.0289 |  |  |
| 204653_at   | TFAP2A   | 0.4469  | 0.0315 | 0.3940  | 0.0303 |  |  |
| 204654_s_at | TFAP2A   | 0.3458  | 0.0288 | 0.3502  | 0.0117 |  |  |
| 204676_at   | TMEM186  | -0.1318 | 0.0322 | -0.1197 | 0.0263 |  |  |
| 204783_at   | MLF1     | 0.4388  | 0.0311 | 0.3733  | 0.0363 |  |  |
| 204801_s_at | DHRS12   | -0.1616 | 0.0099 | -0.1116 | 0.0439 |  |  |
| 204832_s_at | BMPRI1A  | -0.2420 | 0.0344 | -0.2048 | 0.0409 |  |  |
| 204885_s_at | MSLN     | 0.2288  | 0.0386 | 0.1967  | 0.0422 |  |  |
| 204972_at   | OAS2     | 0.5458  | 0.0383 | 0.5345  | 0.0207 |  |  |
| 204988_at   | FGF      | -0.2161 | 0.0111 | -0.1509 | 0.0447 |  |  |
| 205010_at   | GNL3L    | 0.3212  | 0.0146 | 0.2819  | 0.0144 |  |  |
| 205053_at   | PRIM1    | 0.2079  | 0.0399 | 0.2004  | 0.0239 |  |  |
| 205056_s_at | GPR162   | -0.1716 | 0.0066 | -0.1428 | 0.0100 |  |  |
| 205072_s_at | XRCC4    | 0.1302  | 0.0446 | 0.1140  | 0.0447 |  |  |
| 205106_at   | CMC4     | -0.1388 | 0.0338 | -0.1409 | 0.0141 |  |  |
| 205147_x_at | NCF4     | 0.2889  | 0.0081 | 0.2452  | 0.0104 |  |  |
| 205169_at   | RBBP5    | 0.3374  | 0.0032 | 0.2916  | 0.0037 |  |  |
| 205263_at   | BCL10    | 0.2489  | 0.0196 | 0.2159  | 0.0209 |  |  |
| 205281_s_at | PIGA     | 0.2856  | 0.0318 | 0.2345  | 0.0443 |  |  |
| 205301_s_at | OGG1     | -0.1970 | 0.0170 | -0.1489 | 0.0402 |  |  |
| 205414_s_at | ARHGAP44 | -0.2492 | 0.0318 | -0.1999 | 0.0494 |  |  |
| 205416_s_at | ATXN3    | 0.1934  | 0.0446 | 0.1894  | 0.0249 |  |  |
| 205432_at   | OVGP1    | -0.2928 | 0.0209 | -0.2586 | 0.0198 |  |  |

|             |             |         |        |         |        |  |  |
|-------------|-------------|---------|--------|---------|--------|--|--|
| 205456_at   | CD3E        | 0.4255  | 0.0032 | 0.3897  | 0.0021 |  |  |
| 205495_s_at | GNLY        | 0.2504  | 0.0197 | 0.1884  | 0.0458 |  |  |
| 205665_at   | TSPAN9      | -0.1900 | 0.0081 | -0.1431 | 0.0235 |  |  |
| 205727_at   | TEP1        | 0.1052  | 0.0388 | 0.0987  | 0.0269 |  |  |
| 205758_at   | CD8A        | 0.6523  | 0.0028 | 0.4853  | 0.0117 |  |  |
| 205809_s_at | WASL        | 0.4550  | 0.0126 | 0.3806  | 0.0173 |  |  |
| 205821_at   | KLRC4-KLRK1 | 0.4303  | 0.0100 | 0.3123  | 0.0338 |  |  |
| 205865_at   | ARID3A      | -0.2547 | 0.0033 | -0.1604 | 0.0386 |  |  |
| 205866_at   | FCN3        | -0.2015 | 0.0073 | -0.1544 | 0.0194 |  |  |
| 205917_at   | ZNF264      | 0.2945  | 0.0214 | 0.2333  | 0.0377 |  |  |
| 205963_s_at | DNAJA3      | -0.1372 | 0.0318 | -0.1102 | 0.0490 |  |  |
| 205967_at   | HIST1H4A    | 0.4188  | 0.0198 | 0.3229  | 0.0407 |  |  |
| 205986_at   | AATK        | -0.1384 | 0.0264 | -0.1273 | 0.0197 |  |  |
| 205988_at   | CD84        | 0.3256  | 0.0144 | 0.2347  | 0.0453 |  |  |
| 206047_at   | GNB3        | -0.1934 | 0.0036 | -0.1741 | 0.0029 |  |  |
| 206082_at   | HCP5        | 0.5976  | 0.0293 | 0.5548  | 0.0209 |  |  |
| 206109_at   | FUT1        | -0.3385 | 0.0055 | -0.2139 | 0.0492 |  |  |
| 206168_at   | ZC3H7B      | -0.1100 | 0.0089 | -0.0947 | 0.0102 |  |  |
| 206178_at   | PLA2G5      | -0.3717 | 0.0169 | -0.3428 | 0.0120 |  |  |
| 206181_at   | SLAMF1      | 0.3753  | 0.0028 | 0.2878  | 0.0092 |  |  |
| 206246_at   | PFKFB4      | -0.1602 | 0.0017 | -0.0957 | 0.0379 |  |  |
| 206247_at   | MICB        | 0.2822  | 0.0141 | 0.2561  | 0.0110 |  |  |
| 206251_s_at | AVPR1A      | -0.0791 | 0.0399 | -0.0764 | 0.0236 |  |  |
| 206327_s_at | CDH15       | -0.1398 | 0.0422 | -0.1218 | 0.0431 |  |  |
| 206330_s_at | SHC3        | -0.1721 | 0.0099 | -0.1302 | 0.0265 |  |  |
| 206366_x_at | XCL1        | 0.6071  | 0.0015 | 0.4444  | 0.0087 |  |  |
| 206369_s_at | PIK3CG      | 0.1468  | 0.0063 | 0.1070  | 0.0240 |  |  |
| 206397_x_at | CERS1       | -0.2302 | 0.0215 | -0.1923 | 0.0283 |  |  |
| 206399_x_at | CACNA1A     | -0.1999 | 0.0039 | -0.1402 | 0.0222 |  |  |
| 206435_at   | B4GALNT1    | -0.1738 | 0.0094 | -0.1421 | 0.0155 |  |  |
| 206447_at   | CELA2A      | -0.1113 | 0.0142 | -0.0818 | 0.0405 |  |  |
| 206563_s_at | OPRL1       | -0.1109 | 0.0255 | -0.0919 | 0.0347 |  |  |
| 206590_x_at | DRD2        | -0.1529 | 0.0138 | -0.1273 | 0.0194 |  |  |
| 206670_s_at | GAD1        | -0.1196 | 0.0394 | -0.1040 | 0.0409 |  |  |
| 206712_at   | GRTP1       | -0.2165 | 0.0013 | -0.1427 | 0.0181 |  |  |
| 206761_at   | CD96        | 0.3248  | 0.0068 | 0.2310  | 0.0292 |  |  |
| 206785_s_at | KLRC1       | 0.5302  | 0.0046 | 0.4445  | 0.0067 |  |  |
| 206824_at   | CES1P1      | -0.1848 | 0.0066 | -0.1798 | 0.0026 |  |  |
| 206827_s_at | TRPV6       | -0.6356 | 0.0076 | -0.5733 | 0.0060 |  |  |
| 206829_x_at | ZNF430      | 0.2690  | 0.0124 | 0.2016  | 0.0332 |  |  |
| 206877_at   | MXD1        | -0.1171 | 0.0276 | -0.1062 | 0.0226 |  |  |
| 206933_s_at | H6PD        | -0.1522 | 0.0216 | -0.1319 | 0.0230 |  |  |
| 206986_at   | FGF18       | -0.1908 | 0.0275 | -0.1492 | 0.0494 |  |  |
| 207004_at   | BCL2        | -0.1917 | 0.0042 | -0.1388 | 0.0190 |  |  |
| 207071_s_at | ACO1        | -0.2244 | 0.0324 | -0.1925 | 0.0362 |  |  |
| 207079_s_at | MED6        | 0.1776  | 0.0357 | 0.1805  | 0.0151 |  |  |
| 207109_at   | POU2F3      | 0.1227  | 0.0463 | 0.1382  | 0.0111 |  |  |
| 207115_x_at | MBTD1       | 0.2198  | 0.0027 | 0.1975  | 0.0021 |  |  |
| 207137_at   | TONSL       | -0.2476 | 0.0006 | -0.1875 | 0.0032 |  |  |
| 207162_s_at | CACNA1B     | -0.1820 | 0.0047 | -0.1162 | 0.0431 |  |  |
| 207218_at   | F9          | 0.0913  | 0.0304 | 0.0937  | 0.0115 |  |  |
| 207253_s_at | UBN1        | -0.1837 | 0.0307 | -0.1906 | 0.0108 |  |  |
| 207306_at   | TCF15       | -0.2041 | 0.0156 | -0.1779 | 0.0161 |  |  |
| 207315_at   | CD226       | 0.0915  | 0.0219 | 0.0735  | 0.0358 |  |  |
| 207354_at   | CCL16       | -0.1748 | 0.0063 | -0.1137 | 0.0458 |  |  |
| 207357_s_at | GALNT10     | -0.2560 | 0.0309 | -0.2207 | 0.0336 |  |  |
| 207419_s_at | RAC2        | 0.5945  | 0.0015 | 0.4192  | 0.0116 |  |  |
| 207510_at   | BDKRB1      | -0.1964 | 0.0017 | -0.1185 | 0.0356 |  |  |
| 207531_at   | CRYGC       | -0.1314 | 0.0349 | -0.1072 | 0.0497 |  |  |
| 207555_s_at | TBXA2R      | -0.1718 | 0.0235 | -0.1394 | 0.0360 |  |  |
| 207603_at   | SLC4A7      | -0.1067 | 0.0140 | -0.0768 | 0.0446 |  |  |
| 207640_x_at | NTN3        | -0.1247 | 0.0271 | -0.1007 | 0.0417 |  |  |
| 207651_at   | GPR171      | 0.5656  | 0.0130 | 0.4134  | 0.0392 |  |  |
| 207659_s_at | MOBP        | -0.1041 | 0.0393 | -0.1266 | 0.0049 |  |  |
| 207679_at   | PAX3        | -0.1243 | 0.0214 | -0.0962 | 0.0424 |  |  |
| 207700_s_at | NCOA3       | 0.3571  | 0.0278 | 0.2984  | 0.0358 |  |  |
| 207723_s_at | KLRC3       | 0.1197  | 0.0148 | 0.1138  | 0.0082 |  |  |
| 207813_s_at | FDXR        | 0.2921  | 0.0160 | 0.2308  | 0.0301 |  |  |

|             |             |         |        |         |        |  |  |
|-------------|-------------|---------|--------|---------|--------|--|--|
| 207872_s_at | LILRA1      | -0.1495 | 0.0026 | -0.1148 | 0.0087 |  |  |
| 207965_at   | NEUROG3     | -0.1947 | 0.0070 | -0.1728 | 0.0063 |  |  |
| 208038_at   | IL1RL2      | -0.1842 | 0.0085 | -0.1225 | 0.0485 |  |  |
| 208054_at   | HERC4       | 0.1375  | 0.0132 | 0.1021  | 0.0364 |  |  |
| 208058_s_at | MGAT3       | -0.1479 | 0.0160 | -0.1363 | 0.0113 |  |  |
| 208073_x_at | TTC3        | -0.1289 | 0.0373 | -0.1407 | 0.0100 |  |  |
| 208105_at   | GIPR        | -0.1325 | 0.0193 | -0.1164 | 0.0189 |  |  |
| 208111_at   | AVPR2       | -0.1265 | 0.0403 | -0.1059 | 0.0498 |  |  |
| 208114_s_at | ISG20L2     | 0.2495  | 0.0327 | 0.2220  | 0.0301 |  |  |
| 208176_at   | DUX1        | -0.2015 | 0.0118 | -0.1408 | 0.0463 |  |  |
| 208275_x_at | UTF1        | -0.1125 | 0.0499 | -0.1091 | 0.0300 |  |  |
| 208321_s_at | CABP1       | -0.1471 | 0.0269 | -0.1339 | 0.0215 |  |  |
| 208366_at   | PCDH11X     | -0.1148 | 0.0065 | -0.0866 | 0.0197 |  |  |
| 208437_at   | CLCN1       | -0.1780 | 0.0090 | -0.1430 | 0.0168 |  |  |
| 208497_x_at | NEUROG1     | -0.1430 | 0.0146 | -0.1320 | 0.0102 |  |  |
| 208506_at   | HIST1H3A    | 0.0823  | 0.0220 | 0.1013  | 0.0017 |  |  |
| 208560_at   | KCNA10      | -0.1392 | 0.0041 | -0.1255 | 0.0032 |  |  |
| 208687_x_at | HSPA8       | -0.1717 | 0.0205 | -0.1636 | 0.0118 |  |  |
| 208711_s_at | CCND1       | 0.5987  | 0.0007 | 0.4792  | 0.0021 |  |  |
| 208718_at   | DDX17       | -0.1369 | 0.0052 | -0.1057 | 0.0141 |  |  |
| 208726_s_at | EIF2S2      | -0.1422 | 0.0385 | -0.1369 | 0.0230 |  |  |
| 208773_s_at | ANKHD1      | 0.1437  | 0.0257 | 0.1158  | 0.0403 |  |  |
| 208803_s_at | SRP72       | -0.1926 | 0.0255 | -0.1537 | 0.0421 |  |  |
| 208827_at   | PSMB6       | -0.1404 | 0.0361 | -0.1493 | 0.0114 |  |  |
| 208911_s_at | PDHB        | -0.2245 | 0.0032 | -0.2256 | 0.0008 |  |  |
| 208957_at   | ERP44       | -0.2265 | 0.0081 | -0.1731 | 0.0214 |  |  |
| 208994_s_at | PPIG        | 0.2473  | 0.0319 | 0.2008  | 0.0468 |  |  |
| 209018_s_at | PINK1       | -0.2180 | 0.0280 | -0.2185 | 0.0121 |  |  |
| 209019_s_at | PINK1       | -0.2167 | 0.0204 | -0.2308 | 0.0051 |  |  |
| 209022_at   | STAG2       | 0.1151  | 0.0298 | 0.0971  | 0.0362 |  |  |
| 209034_at   | PNRC1       | 0.1701  | 0.0459 | 0.1555  | 0.0371 |  |  |
| 209138_x_at | IGLC1       | 1.1023  | 0.0156 | 0.9381  | 0.0189 |  |  |
| 209187_at   | DR1         | 0.2218  | 0.0237 | 0.1903  | 0.0267 |  |  |
| 209212_s_at | KLF5        | 0.6561  | 0.0363 | 0.6552  | 0.0172 |  |  |
| 209244_s_at | KIF1C       | -0.2510 | 0.0050 | -0.2286 | 0.0036 |  |  |
| 209245_s_at | KIF1C       | -0.1534 | 0.0361 | -0.1263 | 0.0489 |  |  |
| 209254_at   | KLHDC10     | 0.1873  | 0.0427 | 0.1778  | 0.0280 |  |  |
| 209296_at   | PPM1B       | -0.2185 | 0.0384 | -0.2324 | 0.0124 |  |  |
| 209374_s_at | IGHM        | 1.3081  | 0.0027 | 0.9959  | 0.0095 |  |  |
| 209409_at   | GRB10       | -0.2214 | 0.0301 | -0.2454 | 0.0065 |  |  |
| 209410_s_at | GRB10       | -0.2658 | 0.0052 | -0.2684 | 0.0014 |  |  |
| 209418_s_at | THOC5       | -0.2146 | 0.0420 | -0.1845 | 0.0458 |  |  |
| 209438_at   | PHKA2       | -0.2565 | 0.0125 | -0.1792 | 0.0481 |  |  |
| 209451_at   | TANK        | 0.2802  | 0.0154 | 0.2154  | 0.0339 |  |  |
| 209484_s_at | NSL1        | 0.2060  | 0.0069 | 0.1422  | 0.0350 |  |  |
| 209527_at   | EXOSC2      | 0.2670  | 0.0050 | 0.2125  | 0.0109 |  |  |
| 209532_at   | PLAA        | -0.1659 | 0.0187 | -0.1362 | 0.0277 |  |  |
| 209715_at   | CBX5        | 0.1677  | 0.0308 | 0.1558  | 0.0220 |  |  |
| 209752_at   | REG1A       | -0.1241 | 0.0286 | -0.1340 | 0.0074 |  |  |
| 209761_s_at | SP110       | 0.3912  | 0.0040 | 0.2572  | 0.0334 |  |  |
| 209769_s_at | SEPT5-GP1BB | -0.2478 | 0.0070 | -0.1843 | 0.0227 |  |  |
| 209810_at   | SFTP8       | -0.1296 | 0.0304 | -0.1032 | 0.0493 |  |  |
| 209932_s_at | DUT         | 0.2113  | 0.0083 | 0.1531  | 0.0301 |  |  |
| 209940_at   | PARP3       | 0.2438  | 0.0338 | 0.2271  | 0.0240 |  |  |
| 209969_s_at | STAT1       | 0.6306  | 0.0113 | 0.5609  | 0.0102 |  |  |
| 210029_at   | IDO1        | 0.6183  | 0.0055 | 0.5017  | 0.0103 |  |  |
| 210137_s_at | DCTD        | -0.1645 | 0.0303 | -0.1347 | 0.0428 |  |  |
| 210163_at   | CXCL11      | 1.2077  | 0.0024 | 1.0428  | 0.0028 |  |  |
| 210211_s_at | HSP90AA1    | -0.1303 | 0.0414 | -0.1449 | 0.0102 |  |  |
| 210290_at   | ZNF174      | -0.2922 | 0.0127 | -0.2185 | 0.0341 |  |  |
| 210295_at   | MAGEA10     | -0.1148 | 0.0101 | -0.0834 | 0.0341 |  |  |
| 210366_at   | SLCO1B1     | -0.1403 | 0.0017 | -0.0998 | 0.0119 |  |  |
| 210373_at   | NPRL2       | -0.1534 | 0.0269 | -0.1250 | 0.0397 |  |  |
| 210456_at   | PCYT1B      | -0.1478 | 0.0164 | -0.1325 | 0.0140 |  |  |
| 210556_at   | NFATC3      | 0.2790  | 0.0094 | 0.2038  | 0.0313 |  |  |
| 210583_at   | POLDIP3     | -0.1487 | 0.0303 | -0.1269 | 0.0347 |  |  |
| 210606_x_at | KLRD1       | 0.1993  | 0.0238 | 0.1842  | 0.0171 |  |  |
| 210642_at   | CCIN        | -0.1764 | 0.0121 | -0.1421 | 0.0213 |  |  |

|             |              |         |        |         |        |  |  |
|-------------|--------------|---------|--------|---------|--------|--|--|
| 210678_s_at | AGPAT2       | -0.2009 | 0.0091 | -0.1481 | 0.0291 |  |  |
| 210752_s_at | MLX          | -0.2219 | 0.0116 | -0.2096 | 0.0066 |  |  |
| 210769_at   | CNGB1        | -0.1769 | 0.0106 | -0.1365 | 0.0248 |  |  |
| 210873_x_at | APOBEC3A     | 0.3628  | 0.0024 | 0.3343  | 0.0014 |  |  |
| 210884_s_at | SPAG11A      | -0.1378 | 0.0104 | -0.1041 | 0.0279 |  |  |
| 210894_s_at | CEP250       | -0.1168 | 0.0256 | -0.1028 | 0.0248 |  |  |
| 210948_s_at | LEF1         | 0.2133  | 0.0423 | 0.2384  | 0.0102 |  |  |
| 210972_x_at | TRAC         | 0.6121  | 0.0046 | 0.3999  | 0.0378 |  |  |
| 211063_s_at | NCK1         | 0.2336  | 0.0091 | 0.1661  | 0.0357 |  |  |
| 211104_s_at | MYO7A        | -0.1495 | 0.0132 | -0.1200 | 0.0233 |  |  |
| 211122_s_at | CXCL11       | 1.4250  | 0.0019 | 1.2576  | 0.0018 |  |  |
| 211164_at   | EPHA3        | 0.0693  | 0.0273 | 0.0657  | 0.0170 |  |  |
| 211179_at   | LOC100506403 | 0.0820  | 0.0190 | 0.0889  | 0.0040 |  |  |
| 211225_at   | FUT5         | -0.1504 | 0.0147 | -0.1323 | 0.0143 |  |  |
| 211305_x_at | FCAR         | -0.1210 | 0.0042 | -0.0791 | 0.0353 |  |  |
| 211367_s_at | CASP1        | 0.6089  | 0.0018 | 0.3825  | 0.0289 |  |  |
| 211377_x_at | MYCN         | -0.1666 | 0.0046 | -0.1150 | 0.0274 |  |  |
| 211430_s_at | IGHG1        | 1.3968  | 0.0073 | 1.0582  | 0.0210 |  |  |
| 211431_s_at | TYRO3        | -0.1243 | 0.0370 | -0.1052 | 0.0438 |  |  |
| 211579_at   | ITGB3        | -0.1017 | 0.0287 | -0.0951 | 0.0195 |  |  |
| 211581_x_at | LST1         | 0.2926  | 0.0068 | 0.2274  | 0.0167 |  |  |
| 211582_x_at | LST1         | 0.3736  | 0.0040 | 0.3112  | 0.0063 |  |  |
| 211603_s_at | ETV4         | -0.2238 | 0.0184 | -0.1656 | 0.0472 |  |  |
| 211604_x_at | HAP1         | -0.1200 | 0.0075 | -0.0975 | 0.0134 |  |  |
| 211633_x_at | IGHG1        | 0.5987  | 0.0035 | 0.5006  | 0.0053 |  |  |
| 211634_x_at | IGHM         | 0.8110  | 0.0025 | 0.7345  | 0.0018 |  |  |
| 211635_x_at | IGHA1        | 0.7219  | 0.0016 | 0.6190  | 0.0021 |  |  |
| 211637_x_at | IGH          | 1.0088  | 0.0009 | 0.8783  | 0.0010 |  |  |
| 211639_x_at | IGH          | 0.5714  | 0.0062 | 0.5537  | 0.0025 |  |  |
| 211640_x_at | IGHG1        | 0.3096  | 0.0110 | 0.2519  | 0.0183 |  |  |
| 211641_x_at | IGHA1        | 0.4943  | 0.0082 | 0.4202  | 0.0104 |  |  |
| 211643_x_at | IGK          | 1.0975  | 0.0010 | 0.9250  | 0.0015 |  |  |
| 211644_x_at | IGK          | 1.3564  | 0.0013 | 1.1466  | 0.0020 |  |  |
| 211645_x_at | IGKV1-17     | 1.4190  | 0.0014 | 1.2427  | 0.0014 |  |  |
| 211650_x_at | IGH          | 0.5387  | 0.0320 | 0.4926  | 0.0252 |  |  |
| 211791_s_at | KCNAB2       | -0.1204 | 0.0456 | -0.1100 | 0.0370 |  |  |
| 211798_x_at | IGLJ3        | 0.8332  | 0.0055 | 0.7607  | 0.0039 |  |  |
| 211867_s_at | PCDHA10      | -0.1426 | 0.0447 | -0.1256 | 0.0434 |  |  |
| 211868_x_at | IGH          | 0.5696  | 0.0067 | 0.4828  | 0.0088 |  |  |
| 211881_x_at | IGLJ3        | 0.6633  | 0.0096 | 0.6689  | 0.0030 |  |  |
| 211904_x_at | RAD52        | -0.1956 | 0.0042 | -0.1205 | 0.0490 |  |  |
| 211908_x_at | IGK          | 0.4903  | 0.0119 | 0.5006  | 0.0035 |  |  |
| 211928_at   | DYNC1H1      | -0.1644 | 0.0188 | -0.1382 | 0.0241 |  |  |
| 211979_at   | GPR107       | -0.3049 | 0.0004 | -0.2632 | 0.0005 |  |  |
| 212248_at   | MTDH         | -0.2362 | 0.0081 | -0.1721 | 0.0287 |  |  |
| 212278_x_at | UBE3A        | -0.2411 | 0.0033 | -0.1755 | 0.0156 |  |  |
| 212371_at   | DES12        | -0.2216 | 0.0335 | -0.2262 | 0.0135 |  |  |
| 212480_at   | SPECC1L      | -0.3332 | 0.0003 | -0.2714 | 0.0009 |  |  |
| 212545_s_at | ZHX3         | -0.1969 | 0.0022 | -0.1690 | 0.0028 |  |  |
| 212592_at   | IGJ          | 1.3858  | 0.0022 | 1.2174  | 0.0022 |  |  |
| 212604_at   | MRPS31       | 0.2477  | 0.0223 | 0.1938  | 0.0415 |  |  |
| 212615_at   | CHD9         | 0.2947  | 0.0040 | 0.2513  | 0.0051 |  |  |
| 212616_at   | CHD9         | 0.2855  | 0.0102 | 0.2286  | 0.0191 |  |  |
| 212701_at   | TLN2         | -0.3528 | 0.0019 | -0.3151 | 0.0016 |  |  |
| 212703_at   | TLN2         | -0.2793 | 0.0098 | -0.2411 | 0.0110 |  |  |
| 212709_at   | NUP160       | 0.2608  | 0.0085 | 0.2337  | 0.0072 |  |  |
| 212834_at   | DDX52        | -0.2373 | 0.0074 | -0.1845 | 0.0179 |  |  |
| 212876_at   | B4GALT4      | -0.1774 | 0.0281 | -0.1659 | 0.0191 |  |  |
| 212890_at   | SLC38A10     | -0.2212 | 0.0247 | -0.1808 | 0.0362 |  |  |
| 212912_at   | RPS6KA2      | -0.1926 | 0.0444 | -0.1784 | 0.0335 |  |  |
| 212954_at   | DYRK4        | -0.1999 | 0.0036 | -0.2006 | 0.0009 |  |  |
| 212999_x_at | HLA-DQB1     | 0.9494  | 0.0028 | 0.6444  | 0.0226 |  |  |
| 213018_at   | GATAD1       | -0.1998 | 0.0458 | -0.1725 | 0.0488 |  |  |
| 213038_at   | RNF19B       | 0.3467  | 0.0067 | 0.3094  | 0.0058 |  |  |
| 213168_at   | SP3          | 0.1865  | 0.0140 | 0.1744  | 0.0088 |  |  |
| 213375_s_at | N4BP2L1      | 0.4238  | 0.0066 | 0.3293  | 0.0163 |  |  |
| 213426_s_at | CAV2         | -0.1606 | 0.0310 | -0.1341 | 0.0397 |  |  |
| 213502_x_at | GUSBP11      | 0.5168  | 0.0331 | 0.4445  | 0.0363 |  |  |

|             |              |         |        |         |        |  |  |
|-------------|--------------|---------|--------|---------|--------|--|--|
| 213550_s_at | IK           | -0.2931 | 0.0169 | -0.2430 | 0.0239 |  |  |
| 213559_s_at | ZNF467       | -0.1572 | 0.0298 | -0.1279 | 0.0435 |  |  |
| 213593_s_at | TRA2A        | 0.4462  | 0.0496 | 0.4300  | 0.0308 |  |  |
| 213613_s_at | NADK         | -0.1384 | 0.0426 | -0.1351 | 0.0240 |  |  |
| 213703_at   | LINC00342    | -0.4155 | 0.0007 | -0.4140 | 0.0001 |  |  |
| 213705_at   | GGCX         | -0.2857 | 0.0282 | -0.2481 | 0.0295 |  |  |
| 213709_at   | BHLHB9       | -0.2151 | 0.0261 | -0.1990 | 0.0188 |  |  |
| 213729_at   | PRPF40A      | 0.3002  | 0.0255 | 0.2388  | 0.0428 |  |  |
| 213785_at   | IPO9         | -0.2023 | 0.0244 | -0.2456 | 0.0023 |  |  |
| 213831_at   | HLA-DQA1     | 1.8140  | 0.0037 | 1.3142  | 0.0172 |  |  |
| 213868_s_at | DHRS7        | -0.7459 | 0.0039 | -0.5025 | 0.0286 |  |  |
| 213874_at   | SERPINA4     | -0.1754 | 0.0171 | -0.1504 | 0.0195 |  |  |
| 213881_x_at | SUMO2        | 0.0935  | 0.0213 | 0.0731  | 0.0401 |  |  |
| 213898_at   | RBFOX2       | -0.1156 | 0.0485 | -0.1111 | 0.0305 |  |  |
| 213999_at   | YIPF4        | -0.1999 | 0.0035 | -0.1278 | 0.0369 |  |  |
| 214037_s_at | CCDC22       | -0.2094 | 0.0199 | -0.1704 | 0.0306 |  |  |
| 214049_x_at | CD7          | 0.1695  | 0.0091 | 0.1361  | 0.0170 |  |  |
| 214105_at   | SOCS3        | -0.1889 | 0.0113 | -0.1324 | 0.0442 |  |  |
| 214122_at   | PDLIM7       | -0.1981 | 0.0048 | -0.1388 | 0.0257 |  |  |
| 214128_at   | DAGLA        | -0.1946 | 0.0029 | -0.1432 | 0.0132 |  |  |
| 214138_at   | ZNF79        | -0.1837 | 0.0226 | -0.1629 | 0.0210 |  |  |
| 214165_s_at | HS6ST1       | -0.1071 | 0.0305 | -0.0931 | 0.0318 |  |  |
| 214181_x_at | LST1         | 0.5195  | 0.0057 | 0.3894  | 0.0186 |  |  |
| 214223_at   | Hs.110820    | -0.2564 | 0.0164 | -0.2247 | 0.0163 |  |  |
| 214244_s_at | ATP6V0E1     | -0.5031 | 0.0034 | -0.3954 | 0.0089 |  |  |
| 214301_s_at | DPYSL4       | -0.1640 | 0.0156 | -0.1253 | 0.0354 |  |  |
| 214395_x_at | EEF1D        | -0.5004 | 0.0101 | -0.3723 | 0.0297 |  |  |
| 214398_s_at | IKBKE        | -0.1209 | 0.0152 | -0.1037 | 0.0174 |  |  |
| 214450_at   | CTSW         | 0.2679  | 0.0301 | 0.2484  | 0.0217 |  |  |
| 214464_at   | CDC42BPA     | 0.3654  | 0.0369 | 0.3247  | 0.0341 |  |  |
| 214551_s_at | CD7          | 0.2558  | 0.0010 | 0.2075  | 0.0025 |  |  |
| 214552_s_at | RABEP1       | -0.4758 | 0.0112 | -0.4163 | 0.0113 |  |  |
| 214567_s_at | XCL1         | 0.5089  | 0.0105 | 0.3727  | 0.0333 |  |  |
| 214570_x_at | LOC100996817 | -0.1910 | 0.0073 | -0.1340 | 0.0332 |  |  |
| 214574_x_at | LST1         | 0.3206  | 0.0108 | 0.2226  | 0.0453 |  |  |
| 214575_s_at | AZU1         | -0.1537 | 0.0020 | -0.1423 | 0.0011 |  |  |
| 214635_at   | CLDN9        | -0.1675 | 0.0090 | -0.1116 | 0.0496 |  |  |
| 214665_s_at | CHP1         | -0.2244 | 0.0092 | -0.1900 | 0.0119 |  |  |
| 214669_x_at | IGKC         | 1.1199  | 0.0029 | 0.8805  | 0.0078 |  |  |
| 214677_x_at | IGLC1        | 1.0668  | 0.0202 | 0.9168  | 0.0227 |  |  |
| 214768_x_at | IGKC         | 1.2882  | 0.0015 | 1.0264  | 0.0040 |  |  |
| 214777_at   | IGKV4-1      | 1.3071  | 0.0007 | 1.0769  | 0.0014 |  |  |
| 214805_at   | EIF4A1       | 0.3905  | 0.0046 | 0.3277  | 0.0068 |  |  |
| 214832_at   | HNF4A        | -0.1281 | 0.0147 | -0.1035 | 0.0245 |  |  |
| 214836_x_at | IGK          | 0.7999  | 0.0119 | 0.6330  | 0.0234 |  |  |
| 214856_at   | SPTBN1       | -0.0996 | 0.0188 | -0.0906 | 0.0147 |  |  |
| 214865_at   | DOT1L        | -0.1246 | 0.0173 | -0.1050 | 0.0222 |  |  |
| 214891_at   | FBXO21       | -0.1664 | 0.0204 | -0.1238 | 0.0496 |  |  |
| 214906_x_at | NABP2L1      | 0.2303  | 0.0426 | 0.2037  | 0.0405 |  |  |
| 214916_x_at | IGHA1        | 0.7073  | 0.0093 | 0.6528  | 0.0062 |  |  |
| 214958_s_at | TMC6         | -0.2959 | 0.0222 | -0.2864 | 0.0116 |  |  |
| 214973_x_at | IGHD         | 0.8956  | 0.0010 | 0.8213  | 0.0006 |  |  |
| 215024_at   | CCZ1B        | 0.3200  | 0.0353 | 0.2925  | 0.0279 |  |  |
| 215026_x_at | SCNN1A       | -0.1905 | 0.0179 | -0.1630 | 0.0208 |  |  |
| 215052_at   | FRMPD4       | -0.1280 | 0.0336 | -0.1079 | 0.0407 |  |  |
| 215070_x_at | RABGAP1      | 0.1878  | 0.0265 | 0.1522  | 0.0403 |  |  |
| 215121_x_at | CYAT1        | 0.9800  | 0.0178 | 0.8387  | 0.0206 |  |  |
| 215176_x_at | IGK          | 1.4640  | 0.0020 | 1.2217  | 0.0033 |  |  |
| 215214_at   | IGLC1        | 0.9943  | 0.0038 | 0.8283  | 0.0059 |  |  |
| 215226_at   | EXPH5        | -0.1354 | 0.0087 | -0.0959 | 0.0352 |  |  |
| 215265_at   | EMX1         | -0.1032 | 0.0351 | -0.0864 | 0.0439 |  |  |
| 215272_at   | OGG1         | -0.1210 | 0.0045 | -0.1098 | 0.0032 |  |  |
| 215315_at   | ZNF549       | 0.1428  | 0.0100 | 0.1195  | 0.0140 |  |  |
| 215343_at   | CCDC88C      | 0.2810  | 0.0247 | 0.2922  | 0.0080 |  |  |
| 215347_at   | FLJ10265     | -0.1034 | 0.0377 | -0.0891 | 0.0408 |  |  |
| 215369_at   | FLJ11396     | -0.1402 | 0.0351 | -0.1190 | 0.0411 |  |  |
| 215371_at   | MED27        | -0.1813 | 0.0168 | -0.1473 | 0.0267 |  |  |
| 215379_x_at | IGLV1-44     | 1.0104  | 0.0132 | 0.8700  | 0.0148 |  |  |

|             |               |         |        |         |        |  |  |
|-------------|---------------|---------|--------|---------|--------|--|--|
| 215412_x_at | LOC100132832  | 0.1579  | 0.0253 | 0.1244  | 0.0446 |  |  |
| 215427_s_at | ZCCHC14       | -0.1602 | 0.0269 | -0.1525 | 0.0163 |  |  |
| 215505_s_at | STRN3         | 0.2429  | 0.0233 | 0.2206  | 0.0187 |  |  |
| 215524_x_at | MGC40069      | 0.2651  | 0.0007 | 0.2231  | 0.0011 |  |  |
| 215622_x_at | PHF7          | -0.1450 | 0.0363 | -0.1335 | 0.0277 |  |  |
| 215633_x_at | LST1          | 0.3067  | 0.0037 | 0.2490  | 0.0072 |  |  |
| 215854_at   | FLJ11844      | 0.1905  | 0.0242 | 0.1481  | 0.0459 |  |  |
| 215870_s_at | PLA2G5        | -0.4464 | 0.0307 | -0.4653 | 0.0105 |  |  |
| 215871_at   | PLA2G5        | -0.1521 | 0.0189 | -0.1329 | 0.0192 |  |  |
| 215882_at   | CEP152        | -0.1421 | 0.0082 | -0.1083 | 0.0220 |  |  |
| 215893_x_at | AF339787.1    | 0.1417  | 0.0048 | 0.1023  | 0.0212 |  |  |
| 215936_s_at | KIAA1033      | 0.3640  | 0.0412 | 0.3167  | 0.0424 |  |  |
| 215937_at   | PTGDR         | -0.0905 | 0.0154 | -0.0760 | 0.0202 |  |  |
| 215939_at   | FLJ12359      | -0.0989 | 0.0219 | -0.0904 | 0.0168 |  |  |
| 215946_x_at | IGLL3P        | 0.8000  | 0.0112 | 0.6880  | 0.0128 |  |  |
| 215949_x_at | IGHM          | 0.4271  | 0.0080 | 0.4155  | 0.0033 |  |  |
| 215967_s_at | LY9           | 0.2236  | 0.0259 | 0.1852  | 0.0352 |  |  |
| 216022_at   | DKFZp564i153  | 0.2458  | 0.0462 | 0.2595  | 0.0167 |  |  |
| 216057_at   | AURKAPS1      | 0.1012  | 0.0227 | 0.0916  | 0.0186 |  |  |
| 216113_at   | ABI2          | 0.2178  | 0.0102 | 0.2095  | 0.0049 |  |  |
| 216137_s_at | MAPK8IP3      | -0.1415 | 0.0214 | -0.1102 | 0.0411 |  |  |
| 216172_at   | FLJ21461      | -0.1426 | 0.0111 | -0.1053 | 0.0330 |  |  |
| 216184_s_at | RIMS1         | 0.2500  | 0.0421 | 0.2649  | 0.0144 |  |  |
| 216207_x_at | IGKC          | 0.8976  | 0.0072 | 0.7682  | 0.0087 |  |  |
| 216214_at   | AF070602.1    | -0.1922 | 0.0075 | -0.1656 | 0.0086 |  |  |
| 216289_at   | GPR144        | -0.2070 | 0.0238 | -0.1700 | 0.0341 |  |  |
| 216340_s_at | CYP2A7P1      | -0.1399 | 0.0037 | -0.0992 | 0.0199 |  |  |
| 216344_at   | NPHP4         | -0.1496 | 0.0095 | -0.1443 | 0.0044 |  |  |
| 216365_x_at | IGLV3-19      | 0.4563  | 0.0170 | 0.3969  | 0.0178 |  |  |
| 216373_at   | TAPT1         | 0.1484  | 0.0051 | 0.1248  | 0.0073 |  |  |
| 216401_x_at | IGKV1-37      | 0.9829  | 0.0083 | 0.8506  | 0.0091 |  |  |
| 216412_x_at | IGLV1-40      | 0.4019  | 0.0151 | 0.3422  | 0.0183 |  |  |
| 216413_at   | GS1-103B18.1  | -0.1085 | 0.0064 | -0.0833 | 0.0173 |  |  |
| 216430_x_at | IGLV1-44      | 0.2952  | 0.0082 | 0.2436  | 0.0129 |  |  |
| 216470_x_at | PRSS2         | -0.1796 | 0.0016 | -0.1220 | 0.0164 |  |  |
| 216473_x_at | DUX2          | -0.2270 | 0.0103 | -0.1823 | 0.0189 |  |  |
| 216486_x_at | ZNF79         | -0.1604 | 0.0248 | -0.1248 | 0.0464 |  |  |
| 216491_x_at | IGHM          | 0.9690  | 0.0052 | 0.8759  | 0.0040 |  |  |
| 216507_at   | TAPT1         | -0.1092 | 0.0487 | -0.0976 | 0.0441 |  |  |
| 216510_x_at | IGHA1         | 0.8435  | 0.0052 | 0.7661  | 0.0038 |  |  |
| 216517_at   | IGKC          | 0.1686  | 0.0319 | 0.1506  | 0.0286 |  |  |
| 216541_x_at | IGHG1         | 0.2660  | 0.0202 | 0.2423  | 0.0157 |  |  |
| 216542_x_at | IGHA1         | 0.4137  | 0.0028 | 0.3994  | 0.0010 |  |  |
| 216557_x_at | IGHA1         | 0.5294  | 0.0194 | 0.4990  | 0.0120 |  |  |
| 216560_x_at | IGLV3-10      | 0.8774  | 0.0098 | 0.7677  | 0.0099 |  |  |
| 216569_at   | FABP3P2       | -0.1186 | 0.0163 | -0.1022 | 0.0181 |  |  |
| 216572_at   | FOXL1         | -0.1265 | 0.0099 | -0.0918 | 0.0335 |  |  |
| 216573_at   | IGLV1-44      | 0.1447  | 0.0364 | 0.1707  | 0.0055 |  |  |
| 216576_x_at | IGK           | 1.2885  | 0.0031 | 1.0585  | 0.0056 |  |  |
| 216596_at   | DKFZp434L187  | -0.1023 | 0.0415 | -0.0864 | 0.0493 |  |  |
| 216599_x_at | SLC22A6       | -0.1766 | 0.0029 | -0.1115 | 0.0355 |  |  |
| 216612_x_at | FLJ11926      | -0.0739 | 0.0476 | -0.0702 | 0.0318 |  |  |
| 216637_at   | DKFZp586A0617 | -0.1358 | 0.0262 | -0.1201 | 0.0246 |  |  |
| 216646_at   | DSCC1         | -0.1588 | 0.0118 | -0.1203 | 0.0300 |  |  |
| 216668_at   | PABPC1P1      | -0.1628 | 0.0139 | -0.1243 | 0.0325 |  |  |
| 216670_at   | KLK13         | -0.1894 | 0.0264 | -0.1548 | 0.0384 |  |  |
| 216707_at   | DKFZp761L0812 | -0.1944 | 0.0126 | -0.1384 | 0.0440 |  |  |
| 216716_at   | ABO           | -0.1677 | 0.0016 | -0.1215 | 0.0098 |  |  |
| 216717_at   | SUPT20H       | -0.0846 | 0.0233 | -0.0661 | 0.0433 |  |  |
| 216808_at   | MIR622        | -0.1304 | 0.0089 | -0.0974 | 0.0265 |  |  |
| 216835_s_at | DOK1          | -0.1946 | 0.0252 | -0.1753 | 0.0213 |  |  |
| 216847_at   | KIAA1660      | -0.1456 | 0.0039 | -0.1042 | 0.0194 |  |  |
| 216853_x_at | IGLJ3         | 0.7118  | 0.0112 | 0.6781  | 0.0059 |  |  |
| 216889_s_at | HNF4A         | -0.2217 | 0.0005 | -0.1861 | 0.0009 |  |  |
| 216900_s_at | CHRNA4        | -0.1275 | 0.0124 | -0.1030 | 0.0213 |  |  |
| 216930_at   | HNF1A         | 0.1310  | 0.0204 | 0.1174  | 0.0176 |  |  |
| 216984_x_at | IGLJ3         | 1.0276  | 0.0019 | 0.9156  | 0.0016 |  |  |
| 216997_x_at | TLE4          | 0.3052  | 0.0067 | 0.2038  | 0.0411 |  |  |



|             |                       |         |        |         |        |  |  |
|-------------|-----------------------|---------|--------|---------|--------|--|--|
| 217006_x_at | FASN                  | -0.1356 | 0.0108 | -0.1009 | 0.0310 |  |  |
| 217022_s_at | IGH                   | 1.2277  | 0.0180 | 1.2071  | 0.0081 |  |  |
| 217050_at   | DIAPH2-AS1            | -0.0801 | 0.0391 | -0.0685 | 0.0437 |  |  |
| 217054_at   | MUC3A                 | -0.2343 | 0.0074 | -0.1882 | 0.0142 |  |  |
| 217067_s_at | DMP1                  | -0.1000 | 0.0101 | -0.0769 | 0.0244 |  |  |
| 217073_x_at | APOA1                 | -0.1514 | 0.0284 | -0.1406 | 0.0201 |  |  |
| 217101_at   | TTC39A                | -0.1588 | 0.0068 | -0.1190 | 0.0213 |  |  |
| 217104_at   | ST20                  | -0.4548 | 0.0059 | -0.2965 | 0.0437 |  |  |
| 217148_x_at | IGLC1                 | 1.1102  | 0.0026 | 0.9770  | 0.0025 |  |  |
| 217157_x_at | IGK                   | 0.8362  | 0.0039 | 0.7136  | 0.0050 |  |  |
| 217179_x_at | IG lambda light chain | 0.9402  | 0.0031 | 0.8015  | 0.0041 |  |  |
| 217219_at   | DKFZP434A062          | -0.1234 | 0.0248 | -0.0964 | 0.0457 |  |  |
| 217227_x_at | IGLV1-44              | 0.8186  | 0.0024 | 0.6819  | 0.0039 |  |  |
| 217235_x_at | IGLL5                 | 0.8378  | 0.0037 | 0.7459  | 0.0032 |  |  |
| 217236_x_at | IGH                   | 0.2605  | 0.0061 | 0.2239  | 0.0072 |  |  |
| 217239_x_at | IGHV3-47              | 0.1432  | 0.0433 | 0.1414  | 0.0229 |  |  |
| 217258_x_at | IGLV1-44              | 0.7002  | 0.0109 | 0.5474  | 0.0235 |  |  |
| 217281_x_at | IGH                   | 0.7526  | 0.0016 | 0.6592  | 0.0017 |  |  |
| 217282_at   | MAN1A2                | -0.1342 | 0.0152 | -0.0970 | 0.0462 |  |  |
| 217303_s_at | ADRB3                 | -0.1802 | 0.0018 | -0.1144 | 0.0272 |  |  |
| 217360_x_at | IGHA1                 | 0.1685  | 0.0374 | 0.1794  | 0.0118 |  |  |
| 217373_x_at | MDM2                  | 0.1963  | 0.0053 | 0.1699  | 0.0060 |  |  |
| 217378_x_at | AC016745.2            | 1.0690  | 0.0046 | 0.9396  | 0.0045 |  |  |
| 217438_at   | RES4-16               | -0.1092 | 0.0079 | -0.0847 | 0.0191 |  |  |
| 217456_x_at | HLA-E                 | 0.3111  | 0.0125 | 0.2726  | 0.0125 |  |  |
| 217462_at   | MYRF                  | -0.1417 | 0.0146 | -0.1201 | 0.0181 |  |  |
| 217474_at   | LINC01482             | -0.1442 | 0.0049 | -0.0923 | 0.0432 |  |  |
| 217480_x_at | AC127391.1            | 0.9434  | 0.0016 | 0.7899  | 0.0026 |  |  |
| 217593_at   | ZSCAN18               | 0.4531  | 0.0066 | 0.3594  | 0.0142 |  |  |
| 217598_at   | CINP                  | 0.1914  | 0.0464 | 0.1740  | 0.0385 |  |  |
| 217627_at   | ZNF573                | 0.2931  | 0.0340 | 0.2555  | 0.0348 |  |  |
| 217641_at   | GPR135                | -0.1699 | 0.0088 | -0.1475 | 0.0095 |  |  |
| 217658_at   | THAP3                 | -0.1989 | 0.0053 | -0.1385 | 0.0285 |  |  |
| 217660_at   | MYH14                 | -0.1398 | 0.0117 | -0.1061 | 0.0295 |  |  |
| 217663_at   | ZNF234                | -0.1194 | 0.0327 | -0.0984 | 0.0446 |  |  |
| 217731_s_at | ITM2B                 | 0.1467  | 0.0331 | 0.1384  | 0.0218 |  |  |
| 217778_at   | SLC39A1               | -0.1345 | 0.0206 | -0.1095 | 0.0316 |  |  |
| 217843_s_at | MED4                  | 0.2348  | 0.0337 | 0.2620  | 0.0073 |  |  |
| 217920_at   | MAN1A2                | -0.2002 | 0.0144 | -0.1787 | 0.0127 |  |  |
| 217925_s_at | C6orf106              | -0.1949 | 0.0217 | -0.1667 | 0.0250 |  |  |
| 217932_at   | MRPS7                 | -0.2132 | 0.0089 | -0.1785 | 0.0125 |  |  |
| 217963_s_at | NGFRAP1               | -0.1345 | 0.0096 | -0.1188 | 0.0091 |  |  |
| 217974_at   | TM7SF3                | 0.3526  | 0.0255 | 0.2820  | 0.0416 |  |  |
| 217985_s_at | BAZ1A                 | 0.4613  | 0.0086 | 0.3824  | 0.0130 |  |  |
| 218089_at   | AAR2                  | -0.0888 | 0.0390 | -0.0771 | 0.0406 |  |  |
| 218140_x_at | SRPRB                 | -0.2622 | 0.0240 | -0.2119 | 0.0374 |  |  |
| 218201_at   | NDUFB2                | -0.1540 | 0.0363 | -0.1665 | 0.0103 |  |  |
| 218227_at   | NUBP2                 | -0.1728 | 0.0141 | -0.1705 | 0.0058 |  |  |
| 218232_at   | C1QA                  | 0.6646  | 0.0007 | 0.4777  | 0.0060 |  |  |
| 218246_at   | MUL1                  | -0.0908 | 0.0397 | -0.0924 | 0.0172 |  |  |
| 218247_s_at | MEX3C                 | 0.2463  | 0.0051 | 0.1590  | 0.0426 |  |  |
| 218250_s_at | CNOT7                 | 0.3305  | 0.0027 | 0.2788  | 0.0039 |  |  |
| 218273_s_at | PDP1                  | 0.3536  | 0.0422 | 0.3202  | 0.0356 |  |  |
| 218410_s_at | PGP                   | -0.1785 | 0.0075 | -0.1827 | 0.0019 |  |  |
| 218438_s_at | MED28                 | 0.1875  | 0.0204 | 0.1669  | 0.0185 |  |  |
| 218440_at   | MCCC1                 | -0.2278 | 0.0483 | -0.2306 | 0.0228 |  |  |
| 218547_at   | DHDDS                 | -0.1703 | 0.0040 | -0.1125 | 0.0327 |  |  |
| 218589_at   | LPAR6                 | 0.2892  | 0.0420 | 0.2572  | 0.0388 |  |  |
| 218738_s_at | RNF138                | 0.2195  | 0.0045 | 0.1358  | 0.0494 |  |  |
| 218774_at   | DCPS                  | 0.1759  | 0.0433 | 0.1881  | 0.0141 |  |  |
| 218786_at   | NT5DC3                | -0.3496 | 0.0021 | -0.3473 | 0.0005 |  |  |
| 218822_s_at | LOC100652930          | -0.1866 | 0.0062 | -0.1207 | 0.0468 |  |  |
| 218967_s_at | PTER                  | 0.3152  | 0.0428 | 0.3690  | 0.0075 |  |  |
| 218996_at   | TFPT                  | -0.4766 | 0.0039 | -0.2988 | 0.0432 |  |  |
| 219021_at   | RNF121                | -0.1189 | 0.0350 | -0.1432 | 0.0044 |  |  |
| 219092_s_at | IPPK                  | -0.2079 | 0.0137 | -0.1553 | 0.0363 |  |  |
| 219159_s_at | SLAMF7                | 0.2335  | 0.0140 | 0.2161  | 0.0095 |  |  |
| 219161_s_at | CKLF                  | 0.3159  | 0.0196 | 0.2344  | 0.0490 |  |  |

|             |              |         |        |         |        |  |  |
|-------------|--------------|---------|--------|---------|--------|--|--|
| 219172_at   | UBTD1        | -0.1735 | 0.0026 | -0.1558 | 0.0021 |  |  |
| 219201_s_at | TWSG1        | -0.3015 | 0.0371 | -0.2572 | 0.0423 |  |  |
| 219218_at   | BAHCC1       | -0.2107 | 0.0141 | -0.1807 | 0.0162 |  |  |
| 219228_at   | ZNF331       | 0.4567  | 0.0124 | 0.3987  | 0.0128 |  |  |
| 219415_at   | TTYH1        | -0.1290 | 0.0369 | -0.1469 | 0.0073 |  |  |
| 219417_s_at | C17orf59     | -0.1660 | 0.0145 | -0.1188 | 0.0472 |  |  |
| 219528_s_at | BCL11B       | 0.4414  | 0.0038 | 0.3084  | 0.0224 |  |  |
| 219540_at   | ZNF267       | 0.3383  | 0.0037 | 0.2099  | 0.0442 |  |  |
| 219599_at   | EIF4B        | -0.5689 | 0.0077 | -0.4261 | 0.0235 |  |  |
| 219681_s_at | RAB11FIP1    | 0.3776  | 0.0458 | 0.3312  | 0.0454 |  |  |
| 219692_at   | KREMEN2      | -0.2156 | 0.0201 | -0.1980 | 0.0149 |  |  |
| 219712_s_at | SHPK         | 0.1260  | 0.0488 | 0.1212  | 0.0304 |  |  |
| 219730_at   | LOC100996782 | 0.1566  | 0.0093 | 0.1332  | 0.0117 |  |  |
| 219732_at   | LPPR1        | -0.5806 | 0.0152 | -0.4223 | 0.0450 |  |  |
| 219739_at   | RNF186       | -0.1541 | 0.0459 | -0.1421 | 0.0355 |  |  |
| 219784_at   | C16orf95     | -0.1444 | 0.0195 | -0.1354 | 0.0125 |  |  |
| 219834_at   | CARF         | 0.2455  | 0.0265 | 0.2021  | 0.0370 |  |  |
| 219853_at   | FKRP         | -0.2101 | 0.0136 | -0.1863 | 0.0125 |  |  |
| 219855_at   | NUDT11       | -0.5884 | 0.0317 | -0.5501 | 0.0219 |  |  |
| 219995_s_at | ZNF750       | 0.5761  | 0.0224 | 0.5760  | 0.0093 |  |  |
| 220004_at   | DDX43        | -0.3572 | 0.0472 | -0.3687 | 0.0197 |  |  |
| 220038_at   | C8orf44-SGK3 | 0.3928  | 0.0366 | 0.3262  | 0.0475 |  |  |
| 220057_at   | XAGE1A       | -0.1492 | 0.0142 | -0.1145 | 0.0322 |  |  |
| 220154_at   | DST          | -0.1344 | 0.0159 | -0.1310 | 0.0074 |  |  |
| 220178_at   | MFSD12       | -0.3411 | 0.0241 | -0.2979 | 0.0245 |  |  |
| 220330_s_at | SAMSN1       | 0.9198  | 0.0031 | 0.5980  | 0.0311 |  |  |
| 220389_at   | CCDC81       | -0.2026 | 0.0175 | -0.1887 | 0.0116 |  |  |
| 220406_at   | TGFB2        | -0.1369 | 0.0059 | -0.0956 | 0.0297 |  |  |
| 220414_at   | CALML5       | -0.1194 | 0.0105 | -0.0968 | 0.0180 |  |  |
| 220472_at   | ZCCHC4       | 0.1614  | 0.0247 | 0.1372  | 0.0293 |  |  |
| 220576_at   | PGAP1        | 0.4149  | 0.0197 | 0.3221  | 0.0392 |  |  |
| 220626_at   | SERPINA10    | -0.1413 | 0.0057 | -0.1018 | 0.0242 |  |  |
| 220641_at   | NOX5         | -0.2685 | 0.0007 | -0.1795 | 0.0111 |  |  |
| 220649_at   | AGBL3        | -0.1379 | 0.0032 | -0.1187 | 0.0039 |  |  |
| 220652_at   | KIF24        | -0.0758 | 0.0303 | -0.0860 | 0.0055 |  |  |
| 220669_at   | OTUD4        | 0.0969  | 0.0399 | 0.0813  | 0.0491 |  |  |
| 220674_at   | CD22         | -0.1131 | 0.0062 | -0.0887 | 0.0145 |  |  |
| 220684_at   | TBX21        | 0.1400  | 0.0317 | 0.1293  | 0.0235 |  |  |
| 220703_at   | IDI2-AS1     | -0.2096 | 0.0138 | -0.1553 | 0.0381 |  |  |
| 220762_s_at | GNB1L        | -0.1744 | 0.0021 | -0.1116 | 0.0279 |  |  |
| 220837_at   | FLJ20413     | -0.0680 | 0.0114 | -0.0499 | 0.0351 |  |  |
| 220928_s_at | PRDM16       | -0.1394 | 0.0048 | -0.1465 | 0.0008 |  |  |
| 221005_s_at | PTDSS2       | -0.2541 | 0.0025 | -0.1610 | 0.0327 |  |  |
| 221048_x_at | C17orf80     | -0.1782 | 0.0105 | -0.1324 | 0.0308 |  |  |
| 221116_at   | LOC51288     | -0.1423 | 0.0244 | -0.1419 | 0.0106 |  |  |
| 221163_s_at | MLXIPL       | -0.1698 | 0.0341 | -0.1426 | 0.0421 |  |  |
| 221178_at   | BAIAP2L2     | 0.2063  | 0.0295 | 0.2280  | 0.0065 |  |  |
| 221290_s_at | MUM1         | -0.2839 | 0.0043 | -0.1856 | 0.0360 |  |  |
| 221309_at   | RBM17        | -0.2336 | 0.0009 | -0.1910 | 0.0020 |  |  |
| 221321_s_at | KCNIP2       | -0.1573 | 0.0018 | -0.0952 | 0.0360 |  |  |
| 221334_s_at | FOXP3        | -0.1195 | 0.0439 | -0.1075 | 0.0384 |  |  |
| 221342_at   | C6orf25      | -0.1361 | 0.0170 | -0.1312 | 0.0087 |  |  |
| 221360_s_at | GHSR         | -0.1394 | 0.0140 | -0.1099 | 0.0274 |  |  |
| 221511_x_at | CCPG1        | -0.2419 | 0.0282 | -0.2000 | 0.0384 |  |  |
| 221552_at   | ABHD6        | -0.2487 | 0.0166 | -0.2355 | 0.0097 |  |  |
| 221562_s_at | SIRT3        | -0.2280 | 0.0113 | -0.1645 | 0.0380 |  |  |
| 221647_s_at | RIC8A        | -0.0899 | 0.0402 | -0.0898 | 0.0196 |  |  |
| 221651_x_at | IGK          | 1.0252  | 0.0054 | 0.8193  | 0.0114 |  |  |
| 221659_s_at | MYL10        | -0.1113 | 0.0362 | -0.1054 | 0.0235 |  |  |
| 221660_at   | MYL10        | -0.2190 | 0.0159 | -0.1678 | 0.0355 |  |  |
| 221671_x_at | IGK          | 1.0112  | 0.0064 | 0.8138  | 0.0125 |  |  |
| 221746_at   | UBL4A        | -0.1512 | 0.0104 | -0.1047 | 0.0449 |  |  |
| 221767_x_at | HDLBP        | -0.1954 | 0.0112 | -0.1448 | 0.0328 |  |  |
| 221905_at   | CYLD         | 0.4362  | 0.0013 | 0.2790  | 0.0216 |  |  |
| 221953_s_at | MMP24-AS1    | -0.3030 | 0.0054 | -0.2926 | 0.0023 |  |  |
| 221960_s_at | RAB2A        | -0.4176 | 0.0375 | -0.3513 | 0.0456 |  |  |
| 221973_at   | LOC100506076 | -0.4788 | 0.0007 | -0.3769 | 0.0025 |  |  |
| 221975_s_at | C21orf2      | -0.1228 | 0.0303 | -0.1012 | 0.0415 |  |  |

|                       |              |         |        |         |        |  |  |
|-----------------------|--------------|---------|--------|---------|--------|--|--|
| 221978_at             | HLA-F        | 0.4599  | 0.0220 | 0.3703  | 0.0354 |  |  |
| 222020_s_at           | NTM          | 0.3453  | 0.0343 | 0.3750  | 0.0092 |  |  |
| 222044_at             | PCIF1        | 0.1928  | 0.0282 | 0.1755  | 0.0226 |  |  |
| 222048_at             | CRYBB2P1     | -0.3351 | 0.0037 | -0.2230 | 0.0299 |  |  |
| 222059_at             | ZNF335       | -0.1673 | 0.0229 | -0.1462 | 0.0232 |  |  |
| 222060_at             | KRT8P12      | -0.1272 | 0.0382 | -0.1110 | 0.0389 |  |  |
| 222096_x_at           | LOC101060414 | -0.2175 | 0.0070 | -0.1432 | 0.0458 |  |  |
| 222176_at             | FLJ11425     | -0.1986 | 0.0043 | -0.1598 | 0.0089 |  |  |
| 222352_at             | FBXO31       | -0.2523 | 0.0005 | -0.1886 | 0.0032 |  |  |
| 222375_at             | Hs.291839    | 0.2077  | 0.0422 | 0.2206  | 0.0142 |  |  |
| 32069_at              | N4BP1        | 0.2476  | 0.0090 | 0.2255  | 0.0066 |  |  |
| 36564_at              | RNF19B       | 0.2337  | 0.0288 | 0.2494  | 0.0081 |  |  |
| 37145_at              | GNLY         | 0.2566  | 0.0067 | 0.2098  | 0.0116 |  |  |
| 49679_s_at            | MMP24-AS1    | -0.2277 | 0.0071 | -0.2093 | 0.0048 |  |  |
| 64488_at              | IRGQ         | -0.1295 | 0.0436 | -0.1297 | 0.0212 |  |  |
| FX-HUMISGF3A/M97935_3 | STAT1        | 0.4538  | 0.0042 | 0.3862  | 0.0055 |  |  |
| FX-HUMISGF3A/M97935_5 | STAT1        | 0.4574  | 0.0179 | 0.4743  | 0.0053 |  |  |
| X-HUMISGF3A/M97935_MA | STAT1        | 0.4549  | 0.0218 | 0.4034  | 0.0203 |  |  |
| X-HUMISGF3A/M97935_ME | STAT1        | 0.5212  | 0.0103 | 0.4686  | 0.0085 |  |  |
|                       |              |         |        |         |        |  |  |
