# Supplementary material
Source: PubMed Central journal article supplement (PMC4775384)
Supplement: NIHMS749191-supplement-5.pdf [file NIHMS749191-supplement-5.pdf]

**Supplementary Table S6:** Increased expression of genes regulating synaptic signal transduction in the cancerous prostate of nicotine-treated TRAMP mice

| SAM-based analysis comparing gene expression in the cancerous prostate of nicotine-treated versus untreated animals (reference group)                                |          |           |             |                   |  |
|----------------------------------------------------------------------------------------------------------------------------------------------------------------------|----------|-----------|-------------|-------------------|--|
| Gene Name                                                                                                                                                            | Gene ID  | Gene Name | Fold Change | FDR or q-value(%) |  |
| amphiphysin                                                                                                                                                          | 10403796 | Amph      | 2.605910617 | 10.5              |  |
| ankyrin repeat and sterile alpha motif domain containing 1B                                                                                                          | 10365682 | Anks1b    | 2.223828912 | 11.6              |  |
| bassoon                                                                                                                                                              | 10596880 | Bsn       | 1.621655534 | 9.3               |  |
| cerebellin 1 precursor protein; similar to precerebellin-1                                                                                                           | 10580469 | Cbln1     | 1.896906804 | 14.1              |  |
| cholinergic receptor, nicotinic, alpha polypeptide 4                                                                                                                 | 10490559 | Chrna4    | 1.710195671 | 18.7              |  |
| cholinergic receptor, nicotinic, beta polypeptide 2 (neuronal)                                                                                                       | 10499643 | Chrnb2    | 2.151887416 | 8.9               |  |
| cytoplasmic FMR1 interacting protein 2                                                                                                                               | 10385391 | Cyfp2     | 1.849650381 | 15.2              |  |
| Fas apoptotic inhibitory molecule 2                                                                                                                                  | 10432492 | Faim2     | 1.698617007 | 11.3              |  |
| gamma-aminobutyric acid (GABA) B receptor, 2; similar to ortholog of human G protein-coupled receptor 51 GPR51                                                       | 10512807 | Gabbr2    | 1.553464421 | 20.6              |  |
| gamma-aminobutyric acid (GABA) A receptor, subunit alpha 2; similar to Gamma-aminobutyric-acid receptor subunit alpha-2 precursor (GABA(A) receptor subunit alpha-2) | 10530406 | Gabra2    | 1.501235592 | 25                |  |
| gamma-aminobutyric acid (GABA) A receptor, subunit beta 1                                                                                                            | 10522324 | Gabrb1    | 1.729684369 | 11.6              |  |
| gamma-aminobutyric acid (GABA) A receptor, subunit beta 3                                                                                                            | 10553773 | Gabrb3    | 3.07055831  | 10.9              |  |
| gamma-aminobutyric acid (GABA) A receptor, subunit gamma 2                                                                                                           | 10385283 | Gabrg2    | 1.736988738 | 14.1              |  |
| gamma-aminobutyric acid (GABA) A receptor, subunit theta                                                                                                             | 10600069 | Gabrq     | 1.60251671  | 16.3              |  |
| growth associated protein 43                                                                                                                                         | 10439514 | Gap43     | 1.702087731 | 18.7              |  |
| glycine receptor, alpha 2 subunit                                                                                                                                    | 10607792 | Glr2      | 1.97611321  | 25                |  |
| glycine receptor, beta subunit                                                                                                                                       | 10498907 | Glr3      | 1.55357598  | 20.6              |  |
| G protein-coupled receptor 156                                                                                                                                       | 10435661 | Gpr156    | 1.5288707   | 14.1              |  |
| glutamate receptor, ionotropic, AMPA2 (alpha 2)                                                                                                                      | 10498885 | Gria2     | 2.476505114 | 15.2              |  |
| glutamate receptor, ionotropic, AMPA4 (alpha 4); hypothetical protein LOC100044208                                                                                   | 10590663 | Gria4     | 2.213330969 | 15.2              |  |
| glutamate receptor, ionotropic, delta 1                                                                                                                              | 10414137 | Grid1     | 1.541426822 | 17.4              |  |
| glutamate receptor, ionotropic, kainate 2 (beta 2)                                                                                                                   | 10368999 | Grik2     | 2.441053983 | 15.2              |  |
| glutamate receptor ionotropic, NMDA3A                                                                                                                                | 10512919 | Grin3a    | 1.626067786 | 22.3              |  |
| leucine-rich repeat LGI family, member 1; predicted gene 3888                                                                                                        | 10462912 | Lgi1      | 1.841380534 | 15.2              |  |
| membrane associated guanylate kinase, WW and PDZ domain containing 2                                                                                                 | 10519913 | Magi2     | 1.784087285 | 10.9              |  |
| neurologin 1                                                                                                                                                         | 10497505 | Nlgn1     | 1.703579412 | 25                |  |
| piccolo (presynaptic cytomatrix protein); hypothetical protein LOC100044163                                                                                          | 10519770 | Pclo      | 1.974999927 | 10.9              |  |
| RIMS binding protein 2                                                                                                                                               | 10534021 | Rimbp2    | 1.92373543  | 11.6              |  |
| regulating synaptic membrane exocytosis 2                                                                                                                            | 10423855 | Rims2     | 1.68542847  | 17.4              |  |
| secretory carrier membrane protein 5                                                                                                                                 | 10593927 | Scamp5    | 1.754386967 | 14.1              |  |
| septin 3                                                                                                                                                             | 10425726 | SEPT3     | 2.080400659 | 15.2              |  |
| synaptosomal-associated protein 25                                                                                                                                   | 10476512 | Snap25    | 1.96892342  | 15.2              |  |
| synaptic vesicle glycoprotein 2 a                                                                                                                                    | 10494372 | Sv2a      | 2.282395172 | 11.3              |  |
| synaptic vesicle glycoprotein 2 b                                                                                                                                    | 10564646 | Sv2b      | 2.43014534  | 11.3              |  |
| SV2 related protein                                                                                                                                                  | 10532784 | Svop      | 1.583684553 | 14.1              |  |
| synapsin I                                                                                                                                                           | 10603843 | Syn1      | 2.192080531 | 10.9              |  |
| synapsin II                                                                                                                                                          | 10540880 | Syn2      | 2.577647527 | 10.5              |  |
| synaptogyrin 1                                                                                                                                                       | 10425335 | Syng1     | 1.637383883 | 11.3              |  |
| synaptophysin                                                                                                                                                        | 10598359 | Syp       | 2.060606172 | 11.3              |  |
| synaptotagmin I                                                                                                                                                      | 10372324 | Syt1      | 3.69464769  | 11.3              |  |
| synaptotagmin XI; similar to synaptotagmin XI                                                                                                                        | 10499431 | Syt11     | 1.966051073 | 15.2              |  |
| synaptotagmin II                                                                                                                                                     | 10350077 | Syt2      | 1.76861717  | 8.4               |  |
| synaptotagmin V                                                                                                                                                      | 10559580 | Syt5      | 2.058930597 | 10.9              |  |
| synaptotagmin IX                                                                                                                                                     | 10556067 | Syt9      | 2.073449629 | 10.9              |  |
| unc-13 homolog A (C. elegans)                                                                                                                                        | 10579554 | Unc13a    | 2.01193626  | 10.7              |  |
