# Supplementary material
Source: PubMed Central journal article supplement (PMC4775384)
Supplement: NIHMS749191-supplement-6.pdf [file NIHMS749191-supplement-6.pdf]

**Supplementary Table 7: Genes differently expressed between current and never smokers in microdissected prostate tumors**

SAM (Significance Analysis of Microarrays)-based analysis; FDR (q-value) < 30%

| GenBankID | Gene Symbol      | Gene ID     | Fold Change | q-value(%) | t-test_P value |
|-----------|------------------|-------------|-------------|------------|----------------|
| AI636775  | ACBD3            | 202323_s_at | 1.78        | 0          | 1.89E-04       |
| NM_000685 | AGTR1            | 205357_s_at | 3.88        | 0          | 2.40E-03       |
| NM_001144 | AMFR             | 202203_s_at | 3.74        | 0          | 1.03E-04       |
| AK022511  | CNAP1            | 201774_s_at | 1.86        | 0          | 2.12E-03       |
| NM_001452 | FOXF2            | 206377_at   | 2.15        | 0          | 2.09E-03       |
| NM_006877 | GMPR             | 204187_at   | 0.36        | 0          | 6.57E-04       |
| NM_006896 | HOXA7            | 206848_at   | 1.98        | 0          | 1.12E-03       |
| NM_030915 | LBH              | 221011_s_at | 3.09        | 0          | 4.41E-03       |
| NM_014185 | RANGNRF          | 218526_s_at | 0.59        | 0          | 4.09E-05       |
| BG251218  | RBM25            | 212030_at   | 1.8         | 0          | 3.40E-04       |
| NM_018676 | THSD1 /// THSD1P | 219477_s_at | 2.05        | 0          | 1.48E-03       |
| NM_007005 | TLE4             | 204872_at   | 3.22        | 0          | 7.62E-03       |
| AW502434  | USP34            | 212065_s_at | 2.16        | 0          | 1.43E-03       |
| BF674349  | WWTR1            | 202133_at   | 1.63        | 0          | 2.53E-03       |
| NM_007158 | CSDE1            | 219939_s_at | 1.95        | 3.16       | 2.84E-03       |
| NM_014710 | GPRASP1          | 204793_at   | 1.78        | 3.16       | 3.96E-03       |
| NM_005525 | HSD11B1          | 205404_at   | 2.08        | 3.16       | 1.70E-03       |
| NM_000222 | KIT              | 205051_s_at | 1.94        | 3.16       | 3.64E-03       |
| AF004222  | RTN2             | 34408_at    | 0.48        | 3.16       | 5.69E-04       |
| NM_006275 | SFRS6            | 206108_s_at | 2.25        | 3.16       | 0.01           |
| NM_003069 | SMARCA1          | 203875_at   | 1.73        | 3.16       | 6.44E-04       |
| AI989477  | SOX4             | 213668_s_at | 1.72        | 3.16       | 7.55E-04       |
| NM_006717 | SPIN             | 217813_s_at | 1.91        | 3.16       | 1.83E-03       |
| AL520908  | SYNCRIP          | 217833_at   | 2           | 3.16       | 1.44E-03       |
| AL136621  | ZNF198           | 210281_s_at | 1.66        | 3.16       | 1.22E-03       |
| NM_004835 | AGTR1            | 208016_s_at | 2.1         | 5.1        | 7.83E-03       |
| N32526    | AKT3             | 212607_at   | 1.85        | 5.1        | 5.11E-03       |
| U90030    | BICD1            | 214806_at   | 3.11        | 5.1        | 8.79E-03       |
| NM_001855 | COL15A1          | 203477_at   | 2.3         | 5.1        | 5.76E-03       |
| BF055107  | RBM25            | 212033_at   | 1.8         | 5.1        | 2.48E-03       |
| NM_006307 | SRPX             | 204955_at   | 2.52        | 5.1        | 9.38E-03       |
| AV721430  | TCF7L2           | 216035_x_at | 1.66        | 5.1        | 3.73E-03       |
| NM_005722 | ACTR2            | 200729_s_at | 1.95        | 5.79       | 7.97E-03       |
| U25110    | BMPR2            | 210214_s_at | 1.61        | 5.79       | 2.34E-03       |
| NM_001759 | CCND2            | 200953_s_at | 1.69        | 5.79       | 5.30E-03       |
| NM_004369 | COL6A3           | 201438_at   | 2.45        | 5.79       | 0.01           |
| U19495    | CXCL12           | 209687_at   | 2.33        | 5.79       | 0.01           |
| NM_001928 | DF               | 205382_s_at | 4.24        | 5.79       | 0.01           |
| AW139179  | FEM1B            | 212373_at   | 1.62        | 5.79       | 5.81E-03       |
| NM_024749 | FLJ12505         | 219740_at   | 1.4         | 5.79       | 1.55E-03       |
| NM_004501 | HNRPU            | 200594_x_at | 1.45        | 5.79       | 4.15E-04       |
| BC000717  | KHDRBS1          | 201488_x_at | 1.6         | 5.79       | 3.91E-03       |
| AW298092  | KIAA0776         | 212634_at   | 2.25        | 5.79       | 6.67E-03       |
| AP000693  | MORC3            | 213000_at   | 1.58        | 5.79       | 3.52E-03       |

|           |           |             |      |      |          |
|-----------|-----------|-------------|------|------|----------|
| AL049593  | PLCB1     | 213222_at   | 1.88 | 5.79 | 6.10E-03 |
| AW117368  | PSD3      | 203354_s_at | 2.2  | 5.79 | 0.01     |
| AI114716  | QKI       | 212263_at   | 1.94 | 5.79 | 5.35E-03 |
| D45198    | SET       | 210231_x_at | 1.45 | 5.79 | 7.72E-04 |
| NM_003069 | SMARCA1   | 203874_s_at | 1.78 | 5.79 | 5.57E-03 |
| AF226044  | SNRK      | 209481_at   | 1.51 | 5.79 | 1.84E-03 |
| NM_031278 | TDRD1     | 221018_s_at | 1.57 | 5.79 | 5.45E-03 |
| NM_003291 | TPP2      | 203375_s_at | 1.49 | 5.79 | 6.86E-04 |
| AU160695  | BUB3      | 201456_s_at | 1.52 | 6.83 | 2.31E-03 |
| NM_000587 | C7        | 202992_at   | 2.56 | 6.83 | 0.02     |
| BF795297  | CSPG6     | 209257_s_at | 1.88 | 6.83 | 0.01     |
| BC000629  | DARS      | 201623_s_at | 1.42 | 6.83 | 1.13E-03 |
| AF000985  | DDX3Y     | 205001_s_at | 1.63 | 6.83 | 0.01     |
| NM_014498 | GOLPH4    | 204324_s_at | 1.71 | 6.83 | 4.39E-03 |
| NM_001533 | HNRPL     | 202072_at   | 1.64 | 6.83 | 0.01     |
| X16135    | HNRPL     | 35201_at    | 1.53 | 6.83 | 5.07E-03 |
| NM_001552 | IGFBP4    | 201508_at   | 1.78 | 6.83 | 8.74E-03 |
| NM_002196 | INSM1     | 206502_s_at | 2.66 | 6.83 | 0.01     |
| AL132776  | KIAA0776  | 212633_at   | 1.96 | 6.83 | 0.01     |
| AL050152  | LMO3      | 204424_s_at | 2.14 | 6.83 | 0.02     |
| R33964    | LOC221981 | 214920_at   | 2.99 | 6.83 | 0.02     |
| NM_005824 | LRRC17    | 205381_at   | 1.56 | 6.83 | 2.31E-03 |
| NM_003829 | MPDZ      | 205079_s_at | 1.65 | 6.83 | 5.69E-03 |
| BG033764  | MTF2      | 209705_at   | 1.66 | 6.83 | 0.01     |
| BE620457  | NRP1      | 212298_at   | 2.24 | 6.83 | 0.01     |
| NM_014778 | NUPL1     | 204435_at   | 2.03 | 6.83 | 8.56E-03 |
| NM_006206 | PDGFRA    | 203131_at   | 2.41 | 6.83 | 0.02     |
| NM_021190 | PTBP2     | 218683_at   | 1.78 | 6.83 | 6.48E-03 |
| AI681120  | RANBP2    | 201711_x_at | 2.09 | 6.83 | 0.01     |
| D26121    | SF1       | 210172_at   | 2.08 | 6.83 | 0.01     |
| NM_005626 | SFRS4     | 201696_at   | 1.42 | 6.83 | 2.63E-03 |
| AK023512  | SPAG9     | 212468_at   | 1.61 | 6.83 | 8.64E-03 |
| NM_004684 | SPARCL1   | 200795_at   | 2.26 | 6.83 | 0.01     |
| AI472757  | SYNCRIP   | 209024_s_at | 2.17 | 6.83 | 0.02     |
| U72069    | TNPO1     | 209226_s_at | 1.58 | 6.83 | 3.57E-03 |
| AK023204  | TOR1AIP1  | 212408_at   | 1.89 | 6.83 | 0.01     |
| BF110993  | TPR       | 201730_s_at | 1.83 | 6.83 | 0.01     |
| AW271713  | TRIM66    | 213748_at   | 1.55 | 6.83 | 4.71E-03 |
| AI439556  | TXNIP     | 201009_s_at | 2.92 | 6.83 | 0.02     |
| AB020707  | WASF3     | 204042_at   | 1.91 | 6.83 | 9.04E-03 |
| N24643    | WSB1      | 201294_s_at | 1.61 | 6.83 | 0.01     |
| NM_015928 | APRIN     | 207956_x_at | 1.51 | 7.41 | 9.01E-03 |
| NM_001669 | ARSD      | 206831_s_at | 1.52 | 7.41 | 3.93E-03 |
| AW517686  | ATP2B4    | 212135_s_at | 1.7  | 7.41 | 0.01     |
| NM_020239 | CDC42SE1  | 218157_x_at | 1.79 | 7.41 | 0.02     |
| NM_024574 | FLJ23191  | 219747_at   | 3.36 | 7.41 | 0.02     |
| AL036840  | FUBP1     | 212847_at   | 1.85 | 7.41 | 0.01     |
| AI762552  | HNRPDL    | 212454_x_at | 1.44 | 7.41 | 1.84E-03 |
| NM_018444 | PPM2C     | 218273_s_at | 1.88 | 7.41 | 0.01     |
| NM_006267 | RANBP2    | 201712_s_at | 1.9  | 7.41 | 0.01     |
| AL117397  | RAPGEF2   | 215992_s_at | 1.5  | 7.41 | 3.26E-03 |
| BF692742  | TIA1      | 201446_s_at | 1.68 | 7.41 | 0.01     |

|           |          |             |      |       |          |
|-----------|----------|-------------|------|-------|----------|
| AA812232  | TXNIP    | 201008_s_at | 2.46 | 7.41  | 0.03     |
| NM_013450 | BAZ2B    | 203080_s_at | 1.59 | 7.68  | 8.32E-03 |
| AL049987  | C6orf216 | 213605_s_at | 1.58 | 7.68  | 7.81E-03 |
| NM_021820 | C6orf75  | 218877_s_at | 1.58 | 7.68  | 6.07E-03 |
| AF213459  | EPHA3    | 206070_s_at | 2.28 | 7.68  | 0.01     |
| NM_002345 | LUM      | 201744_s_at | 2.93 | 7.68  | 0.02     |
| AW575493  | NS3TP2   | 218706_s_at | 1.76 | 7.68  | 9.80E-03 |
| BC005398  | ANAPC13  | 209001_s_at | 1.43 | 9.1   | 5.98E-03 |
| NM_015185 | ARHGEF9  | 203264_s_at | 1.57 | 9.1   | 7.31E-03 |
| U20165    | BMPR2    | 209920_at   | 1.74 | 9.1   | 0.01     |
| NM_007371 | BRD3     | 203825_at   | 1.33 | 9.1   | 2.15E-03 |
| NM_000720 | CACNA1D  | 207998_s_at | 2.02 | 9.1   | 0.01     |
| NM_014900 | COBLL1   | 203642_s_at | 1.61 | 9.1   | 9.83E-03 |
| NM_001349 | DARS     | 201624_at   | 1.83 | 9.1   | 0.02     |
| NM_022105 | DATF1    | 218325_s_at | 1.71 | 9.1   | 0.01     |
| NM_001996 | FBLN1    | 201787_at   | 2.45 | 9.1   | 0.02     |
| BG500067  | G3BP     | 201503_at   | 1.5  | 9.1   | 0.01     |
| AK024995  | GALNT7   | 216757_at   | 1.43 | 9.1   | 0.01     |
| AV725195  | HNRPC    | 214737_x_at | 1.38 | 9.1   | 6.76E-03 |
| AA664258  | HNRPC    | 212626_x_at | 1.36 | 9.1   | 2.79E-03 |
| BC002525  | KIAA0494 | 201777_s_at | 1.7  | 9.1   | 0.01     |
| NM_017526 | LEPROT   | 202378_s_at | 1.65 | 9.1   | 0.02     |
| NM_018103 | LRR8D    | 218684_at   | 1.39 | 9.1   | 0.01     |
| AI701430  | MLL      | 212076_at   | 1.57 | 9.1   | 0.01     |
| N29717    | MTRR     | 203199_s_at | 1.54 | 9.1   | 6.57E-03 |
| NM_017544 | NKRF     | 205004_at   | 1.32 | 9.1   | 5.88E-04 |
| NM_005124 | NUP153   | 202097_at   | 1.79 | 9.1   | 0.01     |
| AL136920  | PAIP1    | 209064_x_at | 1.56 | 9.1   | 9.03E-03 |
| NM_016205 | PDGFC    | 218718_at   | 1.77 | 9.1   | 0.01     |
| N24868    | PIAS1    | 217862_at   | 1.85 | 9.1   | 0.02     |
| AF279899  | PNRC1    | 209034_at   | 1.58 | 9.1   | 8.60E-03 |
| BE670915  | PUM1     | 201165_s_at | 1.85 | 9.1   | 0.01     |
| D28482    | RBMS1    | 209868_s_at | 2.16 | 9.1   | 0.02     |
| NM_016837 | RBMS1    | 207266_x_at | 2.02 | 9.1   | 0.02     |
| NM_003031 | SIAH1    | 202981_x_at | 1.74 | 9.1   | 0.02     |
| AI184562  | SR140    | 212058_at   | 1.49 | 9.1   | 0.01     |
| NM_022037 | TIA1     | 201450_s_at | 1.79 | 9.1   | 0.02     |
| NM_012290 | TLK1     | 202606_s_at | 1.61 | 9.1   | 0.01     |
| AW612376  | TPP2     | 203374_s_at | 1.59 | 9.1   | 0.01     |
| NM_013293 | TRA2A    | 204658_at   | 1.7  | 9.1   | 0.01     |
| AU149908  | UBXD2    | 212006_at   | 1.52 | 9.1   | 6.02E-03 |
| D89729    | XPO1     | 208775_at   | 1.81 | 9.1   | 0.01     |
| BC002411  | YBX1     | 208628_s_at | 1.42 | 9.1   | 4.36E-03 |
| NM_018651 | ZNF167   | 206314_at   | 1.38 | 9.1   | 1.98E-03 |
| AU157515  | "SEP7    | 213151_s_at | 1.41 | 11.12 | 7.37E-03 |
| M85256    | ---      | 211645_x_at | 1.54 | 11.12 | 0.02     |
| NM_000014 | A2M      | 217757_at   | 2.56 | 11.12 | 0.03     |
| U83115    | AIM1     | 212543_at   | 1.61 | 11.12 | 0.01     |
| NM_015493 | ANKRD25  | 218418_s_at | 1.52 | 11.12 | 0.01     |
| NM_003916 | AP1S2    | 203300_x_at | 1.43 | 11.12 | 4.87E-03 |
| AF231056  | ARID1A   | 210649_s_at | 1.52 | 11.12 | 0.01     |
| NM_000049 | ASPA     | 206030_at   | 1.64 | 11.12 | 0.02     |

|           |                  |             |      |       |          |
|-----------|------------------|-------------|------|-------|----------|
| AL545982  | CCT2             | 201946_s_at | 1.61 | 11.12 | 0.01     |
| AW029619  | CKAP4            | 200998_s_at | 1.51 | 11.12 | 0.01     |
| M33653    | COL13A1          | 211343_s_at | 2.36 | 11.12 | 0.03     |
| NM_031311 | CPVL             | 208146_s_at | 1.66 | 11.12 | 0.02     |
| NM_015986 | CRLF3            | 205474_at   | 1.53 | 11.12 | 0.01     |
| NM_001356 | DDX3X            | 201210_at   | 1.52 | 11.12 | 0.01     |
| AI826799  | EFEMP1           | 201842_s_at | 2.13 | 11.12 | 0.02     |
| NM_001415 | EIF2S3           | 205321_at   | 1.79 | 11.12 | 0.01     |
| NM_018638 | ETNK1            | 219017_at   | 1.64 | 11.12 | 0.01     |
| NM_006486 | FBLN1            | 202995_s_at | 1.88 | 11.12 | 0.03     |
| NM_015176 | FBXO28           | 202272_s_at | 1.51 | 11.12 | 0.01     |
| NM_019083 | FLJ10287         | 219130_at   | 1.59 | 11.12 | 0.01     |
| NM_024826 | FLJ21159         | 220145_at   | 1.56 | 11.12 | 9.78E-03 |
| Z78308    | FNBP3            | 213729_at   | 1.76 | 11.12 | 0.04     |
| NM_001451 | FOXF1            | 205935_at   | 2.04 | 11.12 | 0.02     |
| NM_003507 | FZD7             | 203706_s_at | 1.63 | 11.12 | 0.01     |
| W60800    | HLF              | 204754_at   | 1.5  | 11.12 | 9.22E-03 |
| BF792917  | HOXA10           | 213150_at   | 1.72 | 11.12 | 0.01     |
| BC005332  | IGKC /// IGKV1-5 | 221651_x_at | 2.61 | 11.12 | 0.04     |
| M63438    | IGKC /// IGKV1-5 | 221671_x_at | 2.56 | 11.12 | 0.04     |
| AA551075  | KCTD12           | 212188_at   | 1.53 | 11.12 | 0.02     |
| AA126789  | KIAA0470         | 212746_s_at | 1.44 | 11.12 | 0.01     |
| Z25426    | MAP4K5           | 211081_s_at | 1.63 | 11.12 | 0.03     |
| AA129420  | MATR3            | 214363_s_at | 1.56 | 11.12 | 0.01     |
| NM_004530 | MMP2             | 201069_at   | 1.84 | 11.12 | 0.01     |
| AF072814  | MTF2             | 203346_s_at | 1.47 | 11.12 | 0.01     |
| AB014515  | N4BP1            | 32069_at    | 1.66 | 11.12 | 0.02     |
| AI888672  | NAP1L1           | 208752_x_at | 1.61 | 11.12 | 0.02     |
| NM_022900 | NBLA04196        | 219342_at   | 1.79 | 11.12 | 0.02     |
| X12492    | NFIC             | 213298_at   | 1.49 | 11.12 | 0.01     |
| BF940043  | NID1             | 202007_at   | 1.62 | 11.12 | 0.01     |
| NM_002524 | NRAS             | 202647_s_at | 1.6  | 11.12 | 0.01     |
| AL036344  | NUP50            | 213682_at   | 1.38 | 11.12 | 4.02E-03 |
| NM_014928 | OTUD4            | 203480_s_at | 1.38 | 11.12 | 7.48E-03 |
| NM_022817 | PER2             | 205251_at   | 1.66 | 11.12 | 0.02     |
| NM_003557 | PIP5K1A          | 207391_s_at | 1.31 | 11.12 | 1.13E-03 |
| NM_014892 | RBM16            | 203250_at   | 1.49 | 11.12 | 0.01     |
| NM_016839 | RBMS1            | 203748_x_at | 1.98 | 11.12 | 0.03     |
| NM_002923 | RGS2             | 202388_at   | 1.99 | 11.12 | 0.02     |
| AI348010  | RPL31            | 200962_at   | 1.8  | 11.12 | 0.04     |
| NM_017987 | RUFY2            | 219957_at   | 1.55 | 11.12 | 0.01     |
| AI753659  | SEC23A           | 212887_at   | 1.42 | 11.12 | 5.29E-03 |
| NM_014454 | SESN1            | 218346_s_at | 1.46 | 11.12 | 9.34E-03 |
| AV702810  | SET              | 200630_x_at | 1.38 | 11.12 | 4.09E-03 |
| NM_013386 | SLC25A24         | 204342_at   | 1.48 | 11.12 | 0.01     |
| L13857    | SOS1             | 212777_at   | 2.27 | 11.12 | 0.04     |
| AF231124  | SPOCK            | 202363_at   | 2.22 | 11.12 | 0.03     |
| NM_006603 | STAG2            | 207983_s_at | 1.86 | 11.12 | 0.02     |
| AL133600  | STAM2            | 209649_at   | 1.46 | 11.12 | 8.47E-03 |
| BE672181  | SYNCRIP          | 217832_at   | 1.53 | 11.12 | 0.01     |
| NM_004180 | TANK             | 207616_s_at | 1.62 | 11.12 | 0.02     |
| NM_003201 | TFAM             | 203177_x_at | 1.51 | 11.12 | 0.01     |

|           |                   |             |      |       |          |
|-----------|-------------------|-------------|------|-------|----------|
| BF511231  | TFPI              | 213258_at   | 1.33 | 11.12 | 4.11E-03 |
| D50683    | TGFBR2            | 208944_at   | 1.57 | 11.12 | 0.01     |
| BF593908  | TMF1              | 213024_at   | 1.62 | 11.12 | 0.01     |
| AK027006  | TNRC9             | 214774_x_at | 2.88 | 11.12 | 0.03     |
| NM_003304 | TRPC1             | 205803_s_at | 1.46 | 11.12 | 9.70E-03 |
| N29889    | UBXD2             | 212008_at   | 1.56 | 11.12 | 0.01     |
| AL050376  | USP34             | 212980_at   | 1.33 | 11.12 | 3.01E-03 |
| AF199015  | VIL2              | 217234_s_at | 1.66 | 11.12 | 0.02     |
| BG250310  | ZFP36L1           | 211962_s_at | 1.63 | 11.12 | 0.01     |
| NM_019591 | ZNF26             | 219595_at   | 1.59 | 11.12 | 0.01     |
| AW404894  | ---               | 215176_x_at | 1.71 | 12.38 | 0.02     |
| NM_002940 | ABCE1             | 201873_s_at | 1.4  | 12.38 | 0.02     |
| AW612574  | ANP32E            | 221505_at   | 1.62 | 12.38 | 0.02     |
| NM_004815 | ARHGAP29          | 203910_at   | 1.65 | 12.38 | 0.02     |
| NM_014739 | BCLAF1            | 201084_s_at | 1.5  | 12.38 | 0.01     |
| NM_006135 | CAPZA1            | 208374_s_at | 1.39 | 12.38 | 6.17E-03 |
| AI813758  | COL3A1            | 201852_x_at | 2.21 | 12.38 | 0.04     |
| NM_020640 | DCUN1D1           | 218583_s_at | 1.61 | 12.38 | 0.02     |
| AL527334  | DKFZP564O0523     | 221595_at   | 1.36 | 12.38 | 0.01     |
| AF264787  | DLEU2 /// BCMSUNL | 216870_x_at | 1.46 | 12.38 | 0.01     |
| AL050353  | EXOSC8            | 215136_s_at | 1.39 | 12.38 | 8.63E-03 |
| J03198    | GNAI3             | 201180_s_at | 1.54 | 12.38 | 0.01     |
| NM_005324 | H3F3B             | 211997_x_at | 1.46 | 12.38 | 0.01     |
| NM_005520 | HNRPH1            | 201031_s_at | 1.46 | 12.38 | 0.01     |
| AB000889  | PPAP2B            | 209355_s_at | 2.05 | 12.38 | 0.03     |
| NM_002736 | PRKAR2B           | 203680_at   | 1.76 | 12.38 | 0.02     |
| NM_005813 | PRKD3             | 218236_s_at | 1.4  | 12.38 | 0.01     |
| NM_013352 | SART2             | 218854_at   | 1.74 | 12.38 | 0.02     |
| NM_005069 | SIM2              | 206558_at   | 1.92 | 12.38 | 0.04     |
| NM_003601 | SMARCA5           | 202303_x_at | 1.61 | 12.38 | 0.02     |
| AL078596  | SNX3              | 200067_x_at | 1.54 | 12.38 | 0.01     |
| AB018305  | SPON1             | 209436_at   | 2.04 | 12.38 | 0.03     |
| BC001765  | STAG2             | 209023_s_at | 1.55 | 12.38 | 0.02     |
| AA664011  | TCF7L2            | 216037_x_at | 1.42 | 12.38 | 7.69E-03 |
| AV691491  | TMEM30B           | 213285_at   | 1.87 | 12.38 | 0.02     |
| NM_030755 | TXNDC             | 208097_s_at | 1.59 | 12.38 | 0.03     |
| NM_003340 | UBE2D3            | 200669_s_at | 1.46 | 12.38 | 0.01     |
| NM_016021 | UBE2J1            | 217826_s_at | 1.71 | 12.38 | 0.02     |
| BE966374  | YBX1              | 208627_s_at | 1.46 | 12.38 | 0.01     |
| AI653169  | AK3L1 /// AK3L2   | 204347_at   | 1.4  | 13.24 | 0.01     |
| BE560202  | ANP32A            | 201051_at   | 1.65 | 13.24 | 0.02     |
| U82828    | ATM               | 212672_at   | 1.38 | 13.24 | 8.31E-03 |
| NM_013448 | BAZ1A             | 217986_s_at | 1.59 | 13.24 | 0.02     |
| AF082283  | BCL10             | 205263_at   | 1.51 | 13.24 | 0.02     |
| AL042733  | BRAP              | 41512_at    | 1.35 | 13.24 | 5.99E-03 |
| NM_018963 | BRWD1             | 219280_at   | 1.39 | 13.24 | 0.02     |
| AI671747  | C14orf32          | 212644_s_at | 1.56 | 13.24 | 0.02     |
| NM_017953 | C1orf181          | 218932_at   | 1.42 | 13.24 | 0.01     |
| AW157501  | C6orf111          | 212179_at   | 1.85 | 13.24 | 0.03     |
| NM_024581 | C6orf60           | 220150_s_at | 1.53 | 13.24 | 0.02     |
| AK000168  | CD24              | 216379_x_at | 1.97 | 13.24 | 0.04     |
| AA761181  | CD24              | 209771_x_at | 1.95 | 13.24 | 0.04     |

|           |           |             |      |       |          |
|-----------|-----------|-------------|------|-------|----------|
| NM_000393 | COL5A2    | 221730_at   | 1.63 | 13.24 | 0.02     |
| AW814026  | DNAJC7    | 215252_at   | 1.31 | 13.24 | 4.17E-03 |
| NM_001455 | FOXO3A    | 204132_s_at | 1.64 | 13.24 | 0.02     |
| NM_022003 | FXYP6     | 217897_at   | 1.82 | 13.24 | 0.04     |
| BG485135  | IGKC      | 214669_x_at | 2.17 | 13.24 | 0.04     |
| BF059313  | KIF5C     | 203129_s_at | 1.42 | 13.24 | 0.01     |
| BC003600  | LMO4      | 209205_s_at | 1.51 | 13.24 | 0.01     |
| AL523380  | M96       | 209704_at   | 1.5  | 13.24 | 0.02     |
| AW298170  | MAP4K5    | 203552_at   | 1.43 | 13.24 | 0.02     |
| NM_012325 | MAPRE1    | 200713_s_at | 1.38 | 13.24 | 8.61E-03 |
| NM_006791 | MORF4L1   | 217982_s_at | 1.45 | 13.24 | 0.01     |
| AW148801  | NAP1L1    | 212967_x_at | 1.55 | 13.24 | 0.02     |
| NM_005385 | NKTR      | 202380_s_at | 1.43 | 13.24 | 0.01     |
| AW305097  | OLFML1    | 217525_at   | 1.36 | 13.24 | 9.64E-03 |
| NM_006218 | PIK3CA    | 204369_at   | 1.59 | 13.24 | 0.04     |
| AI633689  | PKN2      | 212629_s_at | 1.77 | 13.24 | 0.04     |
| W86293    | PSMB1     | 214289_at   | 1.44 | 13.24 | 0.01     |
| NM_014676 | PUM1      | 201166_s_at | 1.58 | 13.24 | 0.03     |
| NM_016340 | RAPGEF6   | 219112_at   | 1.54 | 13.24 | 0.03     |
| NM_002890 | RASA1     | 202677_at   | 1.53 | 13.24 | 0.02     |
| AF107493  | RBM5      | 209936_at   | 1.42 | 13.24 | 0.02     |
| NM_016271 | RNF138    | 218738_s_at | 1.65 | 13.24 | 0.03     |
| NM_001008 | RPS4Y1    | 201909_at   | 1.53 | 13.24 | 0.03     |
| NM_012433 | SF3B1     | 201071_x_at | 1.48 | 13.24 | 0.02     |
| BG289800  | SMARCE1   | 211988_at   | 1.58 | 13.24 | 0.03     |
| AB047360  | SNX3      | 210648_x_at | 1.47 | 13.24 | 0.01     |
| NM_005842 | SPRY2     | 204011_at   | 1.72 | 13.24 | 0.03     |
| NM_004780 | TCEAL1    | 204045_at   | 1.41 | 13.24 | 0.01     |
| BC005980  | UBE2D1    | 211764_s_at | 1.49 | 13.24 | 0.01     |
| AB018272  | USP34     | 212066_s_at | 1.47 | 13.24 | 0.01     |
| AL080063  | ZZZ3      | 212893_at   | 1.6  | 13.24 | 0.02     |
| AL096857  | BAT2D1    | 211946_s_at | 1.3  | 14.5  | 0.01     |
| AL080149  | BRD1      | 215460_x_at | 1.32 | 14.5  | 7.73E-03 |
| NM_014962 | BTBD3     | 202946_s_at | 1.57 | 14.5  | 0.02     |
| NM_017972 | C14orf118 | 219720_s_at | 1.34 | 14.5  | 0.01     |
| BF197222  | C6orf120  | 221786_at   | 1.49 | 14.5  | 0.03     |
| M58664    | CD24      | 208651_x_at | 1.58 | 14.5  | 0.02     |
| AY029208  | COL6A2    | 209156_s_at | 1.61 | 14.5  | 0.04     |
| NM_001904 | CTNNB1    | 201533_at   | 1.45 | 14.5  | 0.02     |
| AV729484  | CTSO      | 203758_at   | 1.6  | 14.5  | 0.03     |
| NM_001358 | DHX15     | 201385_at   | 1.49 | 14.5  | 0.03     |
| NM_030621 | DICER1    | 206061_s_at | 1.51 | 14.5  | 0.02     |
| AU118882  | EDNRA     | 204463_s_at | 2.02 | 14.5  | 0.04     |
| NM_018233 | FLJ10826  | 221090_s_at | 1.3  | 14.5  | 7.10E-03 |
| U21915    | GTF2H2    | 215470_at   | 1.79 | 14.5  | 0.04     |
| AI701949  | HNRPK     | 200097_s_at | 1.52 | 14.5  | 0.03     |
| AW051311  | KPNA1     | 202056_at   | 1.38 | 14.5  | 0.01     |
| NM_014020 | LR8       | 220532_s_at | 1.63 | 14.5  | 0.03     |
| NM_000311 | PRNP      | 201300_s_at | 1.51 | 14.5  | 0.02     |
| N38985    | RAP140    | 209285_s_at | 1.32 | 14.5  | 8.07E-03 |
| AL517946  | RBMS1     | 215127_s_at | 1.56 | 14.5  | 0.02     |
| BF059159  | ROBO1     | 213194_at   | 1.69 | 14.5  | 0.03     |

|           |                      |             |      |       |          |
|-----------|----------------------|-------------|------|-------|----------|
| X76302    | RY1                  | 212440_at   | 1.49 | 14.5  | 0.02     |
| NM_018579 | SLC25A37             | 218136_s_at | 1.54 | 14.5  | 0.03     |
| BG540048  | SMEK2                | 222270_at   | 1.23 | 14.5  | 8.93E-04 |
| NM_006283 | TACC1                | 200911_s_at | 1.42 | 14.5  | 0.02     |
| AI687738  | TI-227H /// TUG1     | 212337_at   | 1.39 | 14.5  | 0.01     |
| AL046419  | TIA1                 | 201448_at   | 1.65 | 14.5  | 0.04     |
| NM_016037 | UTP11L               | 218235_s_at | 1.39 | 14.5  | 0.03     |
| AL536319  | WDFY3                | 212606_at   | 1.72 | 14.5  | 0.04     |
| NM_006784 | WDR3                 | 218882_s_at | 1.46 | 14.5  | 0.02     |
| BF592058  | YT521                | 214814_at   | 1.58 | 14.5  | 0.04     |
| AI049962  | ZCCHC11              | 212704_at   | 1.47 | 14.5  | 0.03     |
| NM_021047 | ZNF253 /// LOC114977 | 206900_x_at | 1.29 | 14.5  | 5.42E-03 |
| NM_022826 | "MAR7                | 202654_x_at | 1.48 | 15.23 | 0.03     |
| NM_016248 | AKAP11               | 203156_at   | 1.7  | 15.23 | 0.04     |
| AV712577  | ANP32B               | 201305_x_at | 1.33 | 15.23 | 0.01     |
| AF293841  | ATG5                 | 210639_s_at | 1.31 | 15.23 | 8.12E-03 |
| AW517686  | ATP2B4               | 212136_at   | 1.54 | 15.23 | 0.02     |
| U72937    | ATRX                 | 208861_s_at | 1.55 | 15.23 | 0.03     |
| AA102574  | BAZ1A                | 217985_s_at | 1.43 | 15.23 | 0.02     |
| NM_014577 | BRD1                 | 204520_x_at | 1.32 | 15.23 | 0.02     |
| AA902767  | BRD2                 | 208685_x_at | 1.43 | 15.23 | 0.02     |
| M18767    | C1S                  | 208747_s_at | 1.65 | 15.23 | 0.04     |
| BE674119  | CCNT2                | 213743_at   | 1.48 | 15.23 | 0.04     |
| NM_004660 | DDX3Y                | 205000_at   | 1.55 | 15.23 | 0.03     |
| AI669947  | DPY19L4              | 213391_at   | 1.52 | 15.23 | 0.04     |
| NM_024852 | EIF2C3               | 219426_at   | 1.53 | 15.23 | 0.03     |
| BG481972  | EIF5                 | 208705_s_at | 1.39 | 15.23 | 0.02     |
| NM_017569 | FAM48A               | 220408_x_at | 1.59 | 15.23 | 0.04     |
| NM_021238 | FAM60A               | 220147_s_at | 1.69 | 15.23 | 0.04     |
| NM_018182 | FLJ10700             | 218464_s_at | 1.33 | 15.23 | 0.01     |
| AA830884  | FMR1                 | 215245_x_at | 1.5  | 15.23 | 0.03     |
| NM_002114 | HIVEP1               | 204512_at   | 1.67 | 15.23 | 0.04     |
| W74620    | HNRPD                | 213359_at   | 1.5  | 15.23 | 0.04     |
| AI823592  | KIAA0423             | 213304_at   | 1.65 | 15.23 | 0.04     |
| R02172    | KIAA0492             | 215109_at   | 1.32 | 15.23 | 0.02     |
| AL136821  | KIAA0701             | 213118_at   | 1.46 | 15.23 | 0.03     |
| BE895685  | KIAA0853             | 212402_at   | 1.52 | 15.23 | 0.03     |
| AA488672  | KLF7                 | 204334_at   | 1.36 | 15.23 | 0.02     |
| BF056778  | LIAS                 | 214045_at   | 1.43 | 15.23 | 0.02     |
| D80006    | MOBK1B               | 214812_s_at | 1.45 | 15.23 | 0.03     |
| NM_012343 | NNT                  | 202784_s_at | 1.43 | 15.23 | 0.02     |
| AF070560  | OGT                  | 209240_at   | 1.37 | 15.23 | 0.02     |
| NM_006246 | PPP2R5E              | 203338_at   | 1.53 | 15.23 | 0.04     |
| NM_002824 | PTMS                 | 218045_x_at | 1.55 | 15.23 | 0.03     |
| AV757384  | RBM25                | 212031_at   | 1.41 | 15.23 | 0.01     |
| NM_002912 | REV3L                | 208070_s_at | 1.45 | 15.23 | 0.03     |
| AK023621  | RHOBTB3              | 216048_s_at | 1.77 | 15.23 | 0.04     |
| AW027347  | RSBN1                | 213694_at   | 1.62 | 15.23 | 0.04     |
| BG032035  | RYK                  | 214172_x_at | 1.38 | 15.23 | 0.02     |
| AW173076  | SART3                | 209127_s_at | 1.66 | 15.23 | 0.04     |
| NM_021818 | SAV1                 | 218276_s_at | 1.47 | 15.23 | 0.02     |
| NM_017455 | SDFR1                | 202228_s_at | 1.55 | 15.23 | 0.03     |

|           |                   |             |      |       |          |
|-----------|-------------------|-------------|------|-------|----------|
| AV705803  | SFPQ              | 221768_at   | 1.33 | 15.23 | 0.01     |
| NM_012238 | SIRT1             | 218878_s_at | 1.4  | 15.23 | 0.02     |
| AW151617  | SMAD2             | 203075_at   | 1.4  | 15.23 | 0.03     |
| NM_003187 | TAF9              | 202168_at   | 1.5  | 15.23 | 0.03     |
| NM_031214 | TARDBP            | 221264_s_at | 1.57 | 15.23 | 0.03     |
| NM_014838 | ZBED4             | 204799_at   | 1.41 | 15.23 | 0.02     |
| NM_014795 | ZFHX1B            | 203603_s_at | 1.29 | 15.23 | 5.73E-03 |
| AJ223321  | ZNF238            | 212774_at   | 1.45 | 15.23 | 0.03     |
| AL109722  | ---               | 215307_at   | 1.38 | 18.43 | 0.02     |
| BE566290  | ACTR2             | 200728_at   | 1.45 | 18.43 | 0.02     |
| N74607    | AQP3              | 39248_at    | 0.47 | 18.43 | 8.53E-03 |
| AI694332  | ARIH1             | 201879_at   | 1.48 | 18.43 | 0.03     |
| BF244411  | ARL2BP            | 202092_s_at | 1.25 | 18.43 | 6.39E-03 |
| AB028628  | ASF1A             | 203428_s_at | 1.56 | 18.43 | 0.04     |
| D26069    | CENTB2            | 212476_at   | 1.48 | 18.43 | 0.04     |
| AW972359  | CNOT2             | 222313_at   | 1.56 | 18.43 | 0.03     |
| BF449063  | COL14A1           | 212865_s_at | 1.6  | 18.43 | 0.04     |
| AW052179  | COL4A5            | 213110_s_at | 1.49 | 18.43 | 0.04     |
| AF091086  | COQ2              | 213379_at   | 0.67 | 18.43 | 1.62E-03 |
| BG546884  | CRIM1             | 202551_s_at | 1.56 | 18.43 | 0.04     |
| NM_000775 | CYP2J2            | 205073_at   | 0.45 | 18.43 | 0.01     |
| NM_004938 | DAPK1             | 203139_at   | 1.65 | 18.43 | 0.04     |
| X98743    | DDX18             | 208896_at   | 1.36 | 18.43 | 0.02     |
| NM_024295 | DERL1             | 219402_s_at | 0.55 | 18.43 | 1.29E-03 |
| NM_004415 | DSP               | 200606_at   | 1.61 | 18.43 | 0.04     |
| NM_017976 | FLJ10038          | 205511_at   | 1.37 | 18.43 | 0.03     |
| N34842    | FLJ35348 /// BRD3 | 212547_at   | 1.28 | 18.43 | 0.01     |
| NM_012198 | GCA               | 203765_at   | 1.54 | 18.43 | 0.04     |
| NM_013335 | GMPPA             | 218070_s_at | 0.53 | 18.43 | 3.69E-03 |
| BC001124  | H3F3B             | 209069_s_at | 1.39 | 18.43 | 0.02     |
| NM_000187 | HGD               | 205221_at   | 0.4  | 18.43 | 0.01     |
| BG111260  | HIPK1             | 212293_at   | 1.43 | 18.43 | 0.04     |
| AI375919  | HOXA10            | 213147_at   | 1.43 | 18.43 | 0.02     |
| AI694023  | JMJD1C            | 221763_at   | 1.52 | 18.43 | 0.03     |
| BG339560  | KIAA0794          | 212840_at   | 1.56 | 18.43 | 0.04     |
| BF515597  | KIAA1005          | 213959_s_at | 1.4  | 18.43 | 0.02     |
| NM_014939 | KIAA1012          | 207305_s_at | 1.48 | 18.43 | 0.03     |
| AK001657  | KIAA1033          | 215936_s_at | 1.43 | 18.43 | 0.04     |
| AB033076  | KIDINS220         | 212163_at   | 1.54 | 18.43 | 0.04     |
| NM_016531 | KLF3              | 219657_s_at | 1.49 | 18.43 | 0.03     |
| AL120704  | KPNA3             | 221502_at   | 1.43 | 18.43 | 0.03     |
| NM_003188 | MAP3K7            | 206854_s_at | 1.41 | 18.43 | 0.04     |
| NM_013283 | MAT2B             | 217993_s_at | 1.55 | 18.43 | 0.04     |
| NM_014048 | MKL2              | 218259_at   | 1.43 | 18.43 | 0.03     |
| AW054826  | NF1               | 212678_at   | 1.58 | 18.43 | 0.04     |
| AW291218  | NIBP              | 221836_s_at | 0.67 | 18.43 | 1.61E-03 |
| NM_007363 | NONO              | 200057_s_at | 1.45 | 18.43 | 0.03     |
| BE792072  | OAZ3              | 222075_s_at | 0.55 | 18.43 | 1.64E-03 |
| NM_022776 | OSBPL11           | 218304_s_at | 1.42 | 18.43 | 0.04     |
| NM_000917 | P4HA1             | 207543_s_at | 1.46 | 18.43 | 0.03     |
| AV705244  | PGAP1             | 213469_at   | 1.33 | 18.43 | 0.01     |
| BG292065  | PKN2              | 212628_at   | 1.54 | 18.43 | 0.03     |



|           |                   |             |      |       |          |
|-----------|-------------------|-------------|------|-------|----------|
| NM_000944 | PPP3CA            | 202425_x_at | 1.34 | 18.43 | 0.01     |
| BG249608  | RAB11FIP2         | 203883_s_at | 1.48 | 18.43 | 0.03     |
| AI040009  | RAB3GAP1          | 213530_at   | 1.31 | 18.43 | 0.01     |
| NM_022841 | RFXDC2            | 218430_s_at | 1.46 | 18.43 | 0.03     |
| NM_016626 | RKHD2             | 218247_s_at | 1.59 | 18.43 | 0.04     |
| X96588    | RYK               | 216976_s_at | 1.4  | 18.43 | 0.02     |
| AF130099  | SF3B1             | 211185_s_at | 1.39 | 18.43 | 0.03     |
| AF047033  | SLC4A7            | 209884_s_at | 1.42 | 18.43 | 0.02     |
| AI652586  | SMARCA5           | 213859_x_at | 1.41 | 18.43 | 0.02     |
| NM_004653 | SMCY              | 206700_s_at | 1.44 | 18.43 | 0.03     |
| NM_001920 | SSR1              | 201894_s_at | 1.35 | 18.43 | 0.03     |
| AU154740  | SUPT7L            | 201836_s_at | 1.4  | 18.43 | 0.02     |
| AI744029  | TAF4              | 213090_s_at | 1.33 | 18.43 | 0.02     |
| AK023837  | THRAP2            | 212208_at   | 1.4  | 18.43 | 0.04     |
| AW161626  | TNPO1             | 212635_at   | 1.5  | 18.43 | 0.03     |
| NM_025244 | TSGA10            | 220623_s_at | 0.59 | 18.43 | 1.52E-03 |
| AA081084  | WWTR1             | 202132_at   | 1.46 | 18.43 | 0.02     |
| NM_003406 | YWHAZ             | 200640_at   | 1.42 | 18.43 | 0.03     |
| NM_014827 | ZC3H11A           | 205788_s_at | 1.36 | 18.43 | 0.01     |
| AL136621  | ZNF198            | 210282_at   | 1.41 | 18.43 | 0.02     |
| AU149447  | ZNF200            | 214706_at   | 1.4  | 18.43 | 0.02     |
| AA004757  | ZNF236            | 47571_at    | 1.22 | 18.43 | 3.92E-03 |
| NM_017652 | ZNF586            | 219711_at   | 1.55 | 18.43 | 0.04     |
| BC003629  | ---               | 210230_at   | 0.17 | 19.78 | 0.01     |
| BC002515  | ALDH7A1           | 208951_at   | 1.36 | 19.78 | 0.04     |
| NM_019847 | ANKH              | 220076_at   | 0.43 | 19.78 | 0.02     |
| N35112    | ATP10A            | 214255_at   | 0.49 | 19.78 | 7.92E-03 |
| AI252582  | ATP6VOE           | 214149_s_at | 0.58 | 19.78 | 0.02     |
| AI884867  | ATP6VOE2L         | 213587_s_at | 0.55 | 19.78 | 0.01     |
| BC002521  | ATRX              | 211022_s_at | 1.24 | 19.78 | 8.98E-03 |
| AB026730  | B3GALT4           | 210205_at   | 0.64 | 19.78 | 4.44E-03 |
| AL117381  | BCL2L1            | 212312_at   | 0.69 | 19.78 | 7.23E-03 |
| BC004911  | BSCL2 /// HNRPUL2 | 208906_at   | 0.61 | 19.78 | 0.01     |
| NM_012265 | C22orf3           | 204402_at   | 0.65 | 19.78 | 7.07E-03 |
| BG223334  | C9orf114          | 218565_at   | 0.62 | 19.78 | 2.92E-03 |
| BG528818  | CDC40             | 203376_at   | 1.4  | 19.78 | 0.04     |
| AI251890  | CLK1              | 214683_s_at | 1.4  | 19.78 | 0.03     |
| BG475299  | CTTN              | 214073_at   | 0.62 | 19.78 | 9.85E-03 |
| NM_003588 | CUL4B             | 202214_s_at | 1.42 | 19.78 | 0.04     |
| AB006631  | CUTL2             | 213920_at   | 1.43 | 19.78 | 0.04     |
| AF133298  | CYP4F8            | 210576_at   | 0.02 | 19.78 | 0.04     |
| NM_014152 | DDEF1IT1          | 220694_at   | 1.41 | 19.78 | 0.04     |
| NM_017707 | DDEF1             | 219103_at   | 0.64 | 19.78 | 7.45E-03 |
| AF051782  | DIAPH1            | 209190_s_at | 0.72 | 19.78 | 4.00E-04 |
| NM_000110 | DPYD              | 204646_at   | 1.39 | 19.78 | 0.03     |
| BF055366  | EDG2              | 204037_at   | 1.41 | 19.78 | 0.03     |
| NM_007267 | EVER1             | 204328_at   | 0.32 | 19.78 | 0.04     |
| AL512760  | FADS1             | 208964_s_at | 0.51 | 19.78 | 0.01     |
| BE540552  | FADS1             | 208962_s_at | 0.38 | 19.78 | 0.01     |
| NM_007045 | FGFR1OP           | 205588_s_at | 1.34 | 19.78 | 0.02     |
| NM_016594 | FKBP11            | 219117_s_at | 0.42 | 19.78 | 0.01     |
| NM_016594 | FKBP11            | 219118_at   | 0.41 | 19.78 | 0.01     |

|           |                                       |             |       |       |          |
|-----------|---------------------------------------|-------------|-------|-------|----------|
| NM_024811 | FLJ12529                              | 217866_at   | 1.28  | 19.78 | 0.01     |
| NM_017849 | FLJ20507                              | 219460_s_at | 0.68  | 19.78 | 6.04E-04 |
| AW975050  | FLJ31568                              | 222274_at   | 0.16  | 19.78 | 0.02     |
| NM_002022 | FMO4                                  | 206263_at   | 1.46  | 19.78 | 0.04     |
| NM_014947 | FOXJ3                                 | 206015_s_at | 1.41  | 19.78 | 0.04     |
| NM_000155 | GALT                                  | 203179_at   | 0.63  | 19.78 | 7.80E-03 |
| AF064092  | GNAS                                  | 214548_x_at | 1.28  | 19.78 | 0.01     |
| L47125    | GPC3                                  | 209220_at   | 1.42  | 19.78 | 0.04     |
| Z48950    | H3F3B                                 | 211999_at   | 1.53  | 19.78 | 0.04     |
| NM_005326 | HAGH                                  | 205012_s_at | 0.57  | 19.78 | 4.50E-03 |
| AF274949  | HMG3                                  | 209377_s_at | 1.33  | 19.78 | 0.03     |
| AI144007  | HNRPA1                                | 222040_at   | 1.46  | 19.78 | 0.04     |
| NM_005463 | HNRPDL                                | 201993_x_at | 1.29  | 19.78 | 0.03     |
| AL570294  | HRMT1L1                               | 221564_at   | 1.3   | 19.78 | 0.02     |
| NM_000413 | HSD17B1                               | 205829_at   | 0.57  | 19.78 | 0.01     |
| NM_014159 | HYPB                                  | 220946_s_at | 1.42  | 19.78 | 0.04     |
| AI819238  | ID2 /// ID2B                          | 213931_at   | 0.29  | 19.78 | 0.02     |
| AI926544  | IDS                                   | 212223_at   | 1.34  | 19.78 | 0.03     |
| NM_006820 | IFI44L                                | 204439_at   | 1.38  | 19.78 | 0.04     |
| NM_000640 | IL13RA2                               | 206172_at   | 1.29  | 19.78 | 0.01     |
| U61276    | JAG1                                  | 209098_s_at | 1.41  | 19.78 | 0.03     |
| Y14330    | JAG2                                  | 32137_at    | 0.54  | 19.78 | 4.30E-03 |
| AK026451  | KIAA0794                              | 217100_s_at | 1.34  | 19.78 | 0.02     |
| NM_007054 | KIF3A                                 | 213623_at   | 1.46  | 19.78 | 0.04     |
| BE328312  | LOC133619                             | 221734_at   | 1.35  | 19.78 | 0.02     |
| AI279819  | LOC400451                             | 221880_s_at | 0.72  | 19.78 | 3.59E-03 |
| W45551    | LOC400843                             | 221953_s_at | 0.54  | 19.78 | 0.01     |
| NM_014045 | LRP10                                 | 201412_at   | 0.6   | 19.78 | 4.42E-03 |
| AF329637  | MFN1                                  | 211801_x_at | 1.3   | 19.78 | 0.01     |
| BE502432  | MGA                                   | 212945_s_at | 1.4   | 19.78 | 0.03     |
| NM_004538 | NAP1L3                                | 204749_at   | 1.39  | 19.78 | 0.04     |
| NM_006534 | NCOA3                                 | 207700_s_at | 1.33  | 19.78 | 0.02     |
| BC001805  | NDRG3                                 | 217286_s_at | 0.61  | 19.78 | 3.07E-03 |
| NM_002496 | NDUFS8                                | 203190_at   | 0.67  | 19.78 | 3.52E-03 |
| U41815    | NUP98                                 | 210793_s_at | 1.41  | 19.78 | 0.03     |
| NM_012382 | OSRF                                  | 219421_at   | 1.31  | 19.78 | 0.01     |
| NM_004563 | PCK2                                  | 202847_at   | 0.67  | 19.78 | 2.76E-03 |
| BF432478  | PINK1                                 | 209018_s_at | 0.67  | 19.78 | 7.58E-03 |
| NM_000302 | PLOD1                                 | 200827_at   | 0.65  | 19.78 | 6.13E-03 |
| NM_017761 | PNRC2                                 | 217779_s_at | 1.45  | 19.78 | 0.04     |
| BC005903  | POLR2L                                | 211730_s_at | 0.63  | 19.78 | 4.94E-03 |
| AI692180  | PPFIBP2                               | 212841_s_at | 0.59  | 19.78 | 0.01     |
| NM_024754 | PTCD2                                 | 219658_at   | 1.42  | 19.78 | 0.03     |
| NM_000956 | PTGER2                                | 206631_at   | 1.34  | 19.78 | 0.02     |
| NM_002823 | PTMA /// LOC440085 /// LOC200773_x_at | 1.36        | 19.78 | 0.04  |          |
| AB019490  | RABGAP1L                              | 215342_s_at | 1.46  | 19.78 | 0.04     |
| AL043571  | RANBP2L1 /// DKFZp686P0               | 212842_x_at | 1.35  | 19.78 | 0.02     |
| NM_000965 | RARB                                  | 205080_at   | 1.22  | 19.78 | 5.78E-03 |
| NM_003161 | RPS6KB1                               | 204171_at   | 1.32  | 19.78 | 0.02     |
| NM_005505 | SCARB1                                | 201819_at   | 0.62  | 19.78 | 6.72E-03 |
| NM_001085 | SERPINA3                              | 202376_at   | 0.13  | 19.78 | 0.02     |
| NM_003016 | SFRS2                                 | 200754_x_at | 1.34  | 19.78 | 0.03     |

|           |           |             |      |       |          |
|-----------|-----------|-------------|------|-------|----------|
| AA150165  | SIDT2     | 56256_at    | 0.54 | 19.78 | 0.01     |
| BC003654  | SLC27A3   | 222217_s_at | 0.55 | 19.78 | 0.01     |
| NM_014437 | SLC39A1   | 217778_at   | 0.75 | 19.78 | 5.94E-04 |
| NM_000343 | SLC5A1    | 206628_at   | 0.29 | 19.78 | 0.02     |
| NM_004252 | SLC9A3R1  | 201349_at   | 0.65 | 19.78 | 2.15E-03 |
| BE962615  | SNX3      | 213545_x_at | 1.44 | 19.78 | 0.04     |
| AA524345  | SNX4      | 212652_s_at | 1.53 | 19.78 | 0.04     |
| AB014540  | SWAP70    | 209307_at   | 1.4  | 19.78 | 0.04     |
| AJ270770  | TCF7L2    | 216511_s_at | 1.26 | 19.78 | 0.01     |
| BC001451  | TES       | 202719_s_at | 1.37 | 19.78 | 0.02     |
| NM_005802 | TOPORS    | 204071_s_at | 1.29 | 19.78 | 0.02     |
| NM_006377 | UNC13B    | 202893_at   | 0.67 | 19.78 | 5.30E-03 |
| NM_017684 | VPS13C    | 218396_at   | 1.33 | 19.78 | 0.04     |
| NM_024630 | ZDHHC14   | 219247_s_at | 0.52 | 19.78 | 0.01     |
| NM_005095 | ZNF262    | 202051_s_at | 1.29 | 19.78 | 0.03     |
| AI745225  | ZNF297B   | 204180_s_at | 1.32 | 19.78 | 0.02     |
| AF151074  | "MAR2     | 210075_at   | 0.58 | 22.97 | 0.02     |
| U66046    | ---       | 215057_at   | 1.3  | 22.97 | 0.02     |
| AK024879  | ---       | 216751_at   | 0.7  | 22.97 | 3.88E-03 |
| AI923458  | ABHD11    | 221927_s_at | 0.52 | 22.97 | 0.02     |
| NM_001141 | ALOX15B   | 206714_at   | 0.22 | 22.97 | 0.04     |
| AI141541  | APBA3     | 215148_s_at | 0.6  | 22.97 | 0.01     |
| AI040029  | B4GALT7   | 53076_at    | 0.68 | 22.97 | 7.38E-03 |
| AL524093  | C19orf10  | 221739_at   | 0.59 | 22.97 | 0.01     |
| NM_016458 | C8orf30A  | 219071_x_at | 0.7  | 22.97 | 6.46E-03 |
| Z38645    | CAST1     | 213938_at   | 0.62 | 22.97 | 0.01     |
| NM_014645 | CEP4      | 206003_at   | 1.31 | 22.97 | 0.03     |
| AL022316  | CGI-96    | 33307_at    | 0.59 | 22.97 | 0.01     |
| NM_024734 | CLMN      | 221042_s_at | 0.72 | 22.97 | 9.33E-03 |
| AF029674  | CREB3     | 209432_s_at | 0.61 | 22.97 | 0.01     |
| AF349444  | CRI1      | 211698_at   | 1.37 | 22.97 | 0.04     |
| BF732638  | CSTF2T    | 212901_s_at | 1.29 | 22.97 | 0.02     |
| AK000253  | DDEFL1    | 222236_s_at | 0.61 | 22.97 | 0.01     |
| NM_018973 | DPM3      | 219373_at   | 0.69 | 22.97 | 7.73E-03 |
| AI672185  | DTNB      | 214253_s_at | 0.54 | 22.97 | 0.01     |
| NM_001425 | EMP3      | 203729_at   | 1.36 | 22.97 | 0.04     |
| BG165833  | FADS1     | 208963_x_at | 0.57 | 22.97 | 0.01     |
| BF115776  | FAM20B    | 202915_s_at | 1.42 | 22.97 | 0.04     |
| NM_024582 | FAT4      | 219427_at   | 1.39 | 22.97 | 0.04     |
| M60485    | FGFR1     | 211535_s_at | 1.32 | 22.97 | 0.03     |
| AI003763  | FLJ12681  | 46142_at    | 0.54 | 22.97 | 0.02     |
| NM_000402 | G6PD      | 202275_at   | 0.61 | 22.97 | 0.01     |
| AV717062  | GA17      | 215190_at   | 1.36 | 22.97 | 0.04     |
| NM_001470 | GABBR1    | 203146_s_at | 1.32 | 22.97 | 0.03     |
| NM_001498 | GCLC      | 202923_s_at | 1.32 | 22.97 | 0.03     |
| AI591100  | GNAS      | 212273_x_at | 1.21 | 22.97 | 5.52E-03 |
| NM_024531 | GPR172A   | 218151_x_at | 0.64 | 22.97 | 0.01     |
| NM_002111 | HD        | 202390_s_at | 0.71 | 22.97 | 3.38E-03 |
| NM_006043 | HS3ST2    | 219697_at   | 0.66 | 22.97 | 5.88E-03 |
| AW408194  | IGKV1D-13 | 216207_x_at | 1.29 | 22.97 | 0.03     |
| NM_018725 | IL17RB    | 219255_x_at | 0.56 | 22.97 | 0.01     |
| AB002374  | KIAA0376  | 212480_at   | 0.7  | 22.97 | 3.16E-03 |

|           |          |             |      |       |          |
|-----------|----------|-------------|------|-------|----------|
| NM_014772 | KIAA0427 | 204303_s_at | 0.57 | 22.97 | 0.01     |
| BC001331  | KIAA0652 | 209021_x_at | 0.76 | 22.97 | 8.92E-04 |
| AW043622  | KIAA1008 | 214194_at   | 1.26 | 22.97 | 0.04     |
| N38751    | KLHL22   | 49329_at    | 0.59 | 22.97 | 0.02     |
| NM_005570 | LMAN1    | 203293_s_at | 1.26 | 22.97 | 0.02     |
| NM_005360 | MAF      | 206363_at   | 0.35 | 22.97 | 0.04     |
| U68567    | MAN2B1   | 209166_s_at | 0.62 | 22.97 | 0.02     |
| NM_006575 | MAP4K5   | 203553_s_at | 1.3  | 22.97 | 0.04     |
| NM_022765 | MICAL1   | 218376_s_at | 0.35 | 22.97 | 0.03     |
| NM_018135 | MRPS18A  | 218385_at   | 0.64 | 22.97 | 0.01     |
| AF045451  | NAB1     | 209272_at   | 1.37 | 22.97 | 0.04     |
| BC002398  | NPM1     | 200063_s_at | 1.26 | 22.97 | 0.01     |
| NM_018230 | NUP133   | 202184_s_at | 1.34 | 22.97 | 0.04     |
| AI743990  | PAOX     | 50400_at    | 0.46 | 22.97 | 0.02     |
| NM_005180 | PCGF4    | 202265_at   | 1.33 | 22.97 | 0.03     |
| AW449022  | PDXK     | 218018_at   | 0.66 | 22.97 | 6.86E-03 |
| BF339133  | PEX10    | 213296_at   | 0.61 | 22.97 | 0.01     |
| AF001294  | PHLDA2   | 209803_s_at | 0.52 | 22.97 | 0.03     |
| NM_000300 | PLA2G2A  | 203649_s_at | 0.33 | 22.97 | 0.03     |
| AB017007  | PMS2L2   | 215412_x_at | 1.28 | 22.97 | 0.02     |
| NM_000308 | PPGB     | 200661_at   | 0.67 | 22.97 | 9.69E-03 |
| NM_002712 | PPP1R7   | 201214_s_at | 0.67 | 22.97 | 6.50E-03 |
| AW009884  | PPP2R1B  | 222351_at   | 0.56 | 22.97 | 0.01     |
| N92524    | PRO2730  | 201934_at   | 1.31 | 22.97 | 0.03     |
| NM_002863 | PYGL     | 202990_at   | 0.56 | 22.97 | 0.02     |
| NM_018292 | QRSL1    | 218949_s_at | 1.29 | 22.97 | 0.04     |
| AA582932  | RAB15    | 59697_at    | 0.53 | 22.97 | 0.01     |
| BE502030  | RAB27A   | 209514_s_at | 0.36 | 22.97 | 0.02     |
| AF125393  | RAB27A   | 210951_x_at | 0.33 | 22.97 | 0.03     |
| NM_004581 | RABGGTA  | 203573_s_at | 0.59 | 22.97 | 0.01     |
| U64675    | RANBP2L1 | 210676_x_at | 0.7  | 22.97 | 0.01     |
| R51077    | RUTBC3   | 214779_s_at | 0.63 | 22.97 | 0.01     |
| NM_006455 | SC65     | 204078_at   | 0.48 | 22.97 | 0.04     |
| AA085764  | SIGIRR   | 52940_at    | 0.52 | 22.97 | 0.02     |
| NM_022464 | SIL1     | 218436_at   | 0.56 | 22.97 | 0.01     |
| BF223679  | SLC15A2  | 205316_at   | 0.44 | 22.97 | 0.02     |
| NM_018344 | SLC29A3  | 219344_at   | 0.59 | 22.97 | 0.02     |
| NM_013323 | SNX11    | 220140_s_at | 0.66 | 22.97 | 0.01     |
| BF508662  | SPRY1    | 212558_at   | 1.37 | 22.97 | 0.04     |
| NM_003138 | SRPK2    | 203182_s_at | 1.41 | 22.97 | 0.04     |
| NM_018009 | TAPBPL   | 218747_s_at | 0.65 | 22.97 | 8.20E-03 |
| AF106934  | THRAP5   | 221545_x_at | 0.65 | 22.97 | 0.01     |
| AA314406  | THRAP5   | 43544_at    | 0.5  | 22.97 | 0.02     |
| BF432532  | TIAL1    | 202405_at   | 1.3  | 22.97 | 0.02     |
| NM_006058 | TNIP1    | 207196_s_at | 0.66 | 22.97 | 0.01     |
| J03250    | TOP1     | 208901_s_at | 1.34 | 22.97 | 0.03     |
| AF153604  | USP15    | 210681_s_at | 1.28 | 22.97 | 0.03     |
| AF000994  | UTY      | 211149_at   | 1.32 | 22.97 | 0.03     |
| AF062347  | ZA20D2   | 210275_s_at | 1.38 | 22.97 | 0.04     |
| BF223237  | ZNF292   | 212366_at   | 1.38 | 22.97 | 0.04     |
| AW150913  | "SEP6    | 212415_at   | 1.33 | 25.23 | 0.04     |
| NM_006401 | ANP32B   | 201306_s_at | 1.25 | 25.23 | 0.02     |

|           |                        |             |      |       |          |
|-----------|------------------------|-------------|------|-------|----------|
| AI472320  | AP1GBP1                | 221937_at   | 1.29 | 25.23 | 0.03     |
| NM_024713 | C15orf29               | 218791_s_at | 1.34 | 25.23 | 0.04     |
| AI689402  | CC2D1A                 | 58994_at    | 0.62 | 25.23 | 0.01     |
| AI472139  | CUGBP1                 | 221743_at   | 1.35 | 25.23 | 0.04     |
| NM_001360 | DHCR7                  | 201791_s_at | 0.64 | 25.23 | 0.02     |
| NM_001418 | EIF4G2                 | 200004_at   | 1.29 | 25.23 | 0.03     |
| AA872727  | FDFT1                  | 208647_at   | 0.66 | 25.23 | 0.01     |
| AI421192  | FLJ11193               | 203738_at   | 1.34 | 25.23 | 0.04     |
| U79260    | FTO                    | 209702_at   | 1.32 | 25.23 | 0.03     |
| AI972144  | HADHA                  | 208630_at   | 0.74 | 25.23 | 2.88E-03 |
| D55672    | HNRPD                  | 221481_x_at | 1.24 | 25.23 | 0.02     |
| NM_022460 | HS1BP3                 | 219020_at   | 0.73 | 25.23 | 3.75E-03 |
| NM_016209 | HSPC176                | 218354_at   | 0.61 | 25.23 | 0.01     |
| AW770896  | IGFBP7                 | 213910_at   | 1.27 | 25.23 | 0.03     |
| NM_002253 | KDR                    | 203934_at   | 1.2  | 25.23 | 8.50E-03 |
| AA169780  | LDLRAP1                | 57082_at    | 0.7  | 25.23 | 9.63E-03 |
| NM_018238 | MULK                   | 218568_at   | 1.26 | 25.23 | 0.03     |
| NM_000259 | MYO5A                  | 204527_at   | 0.68 | 25.23 | 9.75E-03 |
| NM_014893 | NLGN4Y                 | 207703_at   | 1.22 | 25.23 | 0.01     |
| NM_014402 | QP-C                   | 201568_at   | 0.67 | 25.23 | 0.01     |
| NM_030666 | SERPINB1               | 212268_at   | 1.28 | 25.23 | 0.04     |
| BG254869  | SFRS2                  | 214882_s_at | 1.33 | 25.23 | 0.04     |
| NM_030794 | TDRD3                  | 208089_s_at | 1.21 | 25.23 | 0.01     |
| AK023111  | TPR                    | 215220_s_at | 1.25 | 25.23 | 0.02     |
| NM_005658 | TRAF1                  | 205599_at   | 0.67 | 25.23 | 0.01     |
| NM_003406 | YWHAZ                  | 200639_s_at | 1.27 | 25.23 | 0.02     |
| AL163248  | ZNF294                 | 215596_s_at | 1.25 | 25.23 | 0.02     |
| NM_014803 | ZNF518                 | 204291_at   | 1.28 | 25.23 | 0.04     |
| NM_023070 | ZNF643                 | 207219_at   | 1.24 | 25.23 | 0.01     |
| BC002571  | ABHD14A                | 210006_at   | 0.66 | 26.16 | 0.01     |
| NM_022060 | ABHD4                  | 218581_at   | 0.77 | 26.16 | 1.95E-03 |
| AL042733  | BRAP                   | 213473_at   | 1.23 | 26.16 | 0.02     |
| NM_022118 | C13orf10               | 218422_s_at | 1.23 | 26.16 | 0.03     |
| NM_018036 | C14orf103              | 219164_s_at | 1.25 | 26.16 | 0.04     |
| NM_023935 | C20orf116              | 218159_at   | 0.65 | 26.16 | 0.01     |
| BC003648  | C4orf15                | 210054_at   | 1.27 | 26.16 | 0.03     |
| NM_018569 | C4orf16                | 219023_at   | 1.29 | 26.16 | 0.04     |
| NM_001874 | CPM                    | 206100_at   | 0.54 | 26.16 | 0.04     |
| BG251175  | DLG1                   | 202515_at   | 1.2  | 26.16 | 0.02     |
| NM_006014 | DXS9879E               | 219061_s_at | 0.67 | 26.16 | 0.01     |
| AA577698  | EIF2S1                 | 201142_at   | 1.2  | 26.16 | 0.02     |
| H93026    | ELOVL1                 | 57163_at    | 0.65 | 26.16 | 0.02     |
| AF094518  | ESRRG                  | 209966_x_at | 0.54 | 26.16 | 0.03     |
| NM_021727 | FADS3                  | 204257_at   | 0.67 | 26.16 | 0.01     |
| NM_018352 | FLJ11184               | 218513_at   | 1.23 | 26.16 | 0.02     |
| AU130523  | FUSIP1                 | 213594_x_at | 1.21 | 26.16 | 0.01     |
| AF180519  | GABARAPL1 /// GABARAPL | 211458_s_at | 0.58 | 26.16 | 0.03     |
| D13287    | GBA /// GBAP           | 210589_s_at | 0.62 | 26.16 | 0.02     |
| NM_021971 | GMPPB                  | 219920_s_at | 0.65 | 26.16 | 0.01     |
| NM_004893 | H2AFY                  | 207168_s_at | 1.25 | 26.16 | 0.03     |
| AI989512  | HRB                    | 218091_at   | 1.2  | 26.16 | 0.01     |
| NM_007043 | HRB2                   | 203203_s_at | 1.21 | 26.16 | 0.02     |

|           |                  |             |      |       |          |
|-----------|------------------|-------------|------|-------|----------|
| NM_013300 | HSU79274         | 204521_at   | 1.26 | 26.16 | 0.04     |
| BG500301  | ITGB1            | 211945_s_at | 1.28 | 26.16 | 0.04     |
| NM_001206 | KLF9             | 203543_s_at | 1.27 | 26.16 | 0.04     |
| AI123251  | LCP2             | 205269_at   | 1.26 | 26.16 | 0.04     |
| M20812    | LOC339562        | 217480_x_at | 1.23 | 26.16 | 0.02     |
| U50529    | LOC88523         | 214748_at   | 0.6  | 26.16 | 0.02     |
| NM_017691 | LRRC49           | 219338_s_at | 1.29 | 26.16 | 0.04     |
| NM_017724 | LRRFIP2          | 218364_at   | 0.63 | 26.16 | 0.02     |
| NM_012222 | MUTYH            | 207727_s_at | 0.67 | 26.16 | 0.01     |
| AU144267  | MYST4            | 212462_at   | 1.27 | 26.16 | 0.04     |
| AB013818  | PEX10            | 206352_s_at | 0.49 | 26.16 | 0.04     |
| U50532    | PFAAP5           | 202258_s_at | 1.27 | 26.16 | 0.04     |
| NM_006221 | PIN1             | 202927_at   | 0.73 | 26.16 | 4.56E-03 |
| NM_021173 | POLD4            | 202996_at   | 0.66 | 26.16 | 0.01     |
| BC002585  | RAB7L1           | 218700_s_at | 0.65 | 26.16 | 0.02     |
| L05095    | RPL30            | 200062_s_at | 1.27 | 26.16 | 0.04     |
| NM_004349 | RUNX1T1          | 205529_s_at | 1.28 | 26.16 | 0.04     |
| NM_014933 | SEC31L1          | 200945_s_at | 1.2  | 26.16 | 0.01     |
| NM_006925 | SFRS5            | 203380_x_at | 1.2  | 26.16 | 0.02     |
| AL035297  | SFT2D2           | 214838_at   | 0.68 | 26.16 | 0.01     |
| AI953523  | SIAH1            | 202980_s_at | 1.23 | 26.16 | 0.02     |
| NM_021082 | SLC15A2          | 205317_s_at | 0.45 | 26.16 | 0.03     |
| M59916    | SMPD1            | 209420_s_at | 0.6  | 26.16 | 0.03     |
| Z97053    | TDE1             | 221472_at   | 1.25 | 26.16 | 0.04     |
| NM_022152 | TMBIM1           | 217730_at   | 0.6  | 26.16 | 0.02     |
| NM_014908 | TMEM15           | 204488_at   | 0.7  | 26.16 | 9.74E-03 |
| N64803    | TNRC6B           | 213254_at   | 1.23 | 26.16 | 0.02     |
| AF091627  | TP73L            | 209863_s_at | 0.54 | 26.16 | 0.02     |
| NM_000375 | UROS             | 203031_s_at | 0.67 | 26.16 | 0.01     |
| NM_001630 | ANXA8            | 203074_at   | 0.53 | 28.63 | 0.04     |
| AI625739  | ARHGEF9          | 203263_s_at | 0.66 | 28.63 | 0.02     |
| NM_007100 | ATP5I            | 207335_x_at | 0.67 | 28.63 | 0.01     |
| BG252666  | ATP8B1           | 214594_x_at | 0.66 | 28.63 | 0.01     |
| NM_020993 | BCL7A            | 203795_s_at | 1.24 | 28.63 | 0.04     |
| AI199589  | C20orf67         | 222045_s_at | 0.71 | 28.63 | 0.02     |
| AK022874  | COG4             | 212189_s_at | 0.7  | 28.63 | 0.01     |
| AJ222967  | CTNS             | 36566_at    | 0.62 | 28.63 | 0.02     |
| NM_016008 | D2LIC            | 203763_at   | 1.22 | 28.63 | 0.03     |
| NM_005675 | DGCR6 /// DGCR6L | 208024_s_at | 0.58 | 28.63 | 0.03     |
| AI475965  | EPRS             | 200842_s_at | 1.24 | 28.63 | 0.04     |
| NM_025087 | FLJ21511         | 220723_s_at | 0.59 | 28.63 | 0.04     |
| NM_015711 | GLTSCR1          | 219445_at   | 0.73 | 28.63 | 7.11E-03 |
| U36310    | GPD2             | 210007_s_at | 1.22 | 28.63 | 0.03     |
| L12392    | HD               | 202389_s_at | 0.71 | 28.63 | 9.86E-03 |
| AL353759  | HIST1H2AC        | 215071_s_at | 1.24 | 28.63 | 0.04     |
| NM_001569 | IRAK1            | 201587_s_at | 0.7  | 28.63 | 0.01     |
| AV724192  | KIAA0644         | 205150_s_at | 1.2  | 28.63 | 0.02     |
| AI869988  | KIAA1698         | 53968_at    | 0.62 | 28.63 | 0.02     |
| NM_004672 | MAP3K6           | 219278_at   | 0.65 | 28.63 | 0.04     |
| AB002301  | MAST4            | 40016_g_at  | 0.51 | 28.63 | 0.04     |
| NM_018161 | NADSYN1          | 218840_s_at | 0.6  | 28.63 | 0.03     |
| AL117502  | NEK9             | 212299_at   | 1.23 | 28.63 | 0.04     |

|           |        |             |      |       |          |
|-----------|--------|-------------|------|-------|----------|
| NM_013349 | NENF   | 218407_x_at | 0.54 | 28.63 | 0.03     |
| AB019494  | NIPBL  | 212469_at   | 1.21 | 28.63 | 0.03     |
| AW055008  | NPEPPS | 201454_s_at | 1.22 | 28.63 | 0.03     |
| AI130920  | PABPN1 | 213046_at   | 1.2  | 28.63 | 0.02     |
| AF035307  | PLXNC1 | 213241_at   | 1.22 | 28.63 | 0.03     |
| NM_002856 | PVRL2  | 203149_at   | 0.77 | 28.63 | 6.88E-03 |
| NM_022768 | RBM15  | 219286_s_at | 1.24 | 28.63 | 0.04     |
| NM_014961 | RIPX   | 203724_s_at | 1.22 | 28.63 | 0.03     |
| NM_017722 | TRMT1  | 203701_s_at | 0.61 | 28.63 | 0.02     |
